1

2 **MULT: An allometric body mass index (ABMI) reference to assess nutritional status of**  
3 **multi-ethnic children and adolescents**

4

5

6

7 Mariane Helen de Oliveira<sup>1,2\*</sup>, Camila Medeiros da Silva Mazzeti<sup>2</sup>, Joana Araújo<sup>3,4,5</sup>, Milton  
8 Severo<sup>3,4,6</sup>, Elisabete Ramos<sup>3,4,5</sup> Kévin Allan Sales Rodrigues<sup>7</sup>, Débora Borges dos Santos  
9 Pereira<sup>1</sup>, Wolney Lisboa Conde<sup>1</sup>.

10

11

12

13 <sup>1</sup>Department of Nutrition, School of Public Health – University of São Paulo, São Paulo,  
14 Brazil

15

16 <sup>2</sup>Chronic Conditions and Diet Observatory (OCCA), Faculty of Pharmaceutical Sciences,  
17 Food and Nutrition (FACFAN) – Federal University of Mato Grosso do Sul

18

19 <sup>3</sup>EPIUnit - Instituto de Saúde Pública da Universidade do Porto, Porto, Portugal

20

21 <sup>4</sup>Laboratório para a Investigação Integrativa e Translacional em Saúde Populacional (ITR),  
22 Porto, Portugal

23

24 <sup>5</sup>Departamento de Ciências da Saúde Pública e Forenses, e Educação Médica – Faculdade de  
25 Medicina da Universidade do Porto, Porto, Portugal

26

27 <sup>6</sup>Departamento de Ensino Pré-Graduado, Instituto de Ciências Biomédicas Abel Salazar da  
28 Universidade do Porto, Porto, Portugal

29

30 <sup>7</sup>Department of Statistics, Institute of Mathematics and Statistics – University of São Paulo

31

32

33 **\*Corresponding author:**

34 E-mail: [marianehelen@alumni.usp.br](mailto:marianehelen@alumni.usp.br)/ [marianehelen@yahoo.com.br](mailto:marianehelen@yahoo.com.br) [MHO]

35

## 36 **ABSTRACT**

37

38 **Objectives:** To develop an allometric body mass index (ABMI) reference that adjusts the  
39 weight in relation to height, taking into account the changes during development (MULT  
40 ABMI reference), and to compare it with international BMI references.

41 **Methods:** The MULT ABMI reference was constructed through the LMS method, calculated  
42 with 65 644 ABMI observations of 17 447 subjects aged 5-22 years, from the United Kingdom,  
43 Ethiopia, India, Peru, Vietnam, Portugal, and Brazil. The M, S, and L curves of the MULT  
44 ABMI reference were compared with the curves of the MULT, World Health Organization  
45 (WHO), Centers for Disease Control and Prevention (CDC), International Obesity Task Force  
46 (IOTF), and Dutch Growth Study (DUTCH).

47 **Results:** The greater differences in the M curve between MULT ABMI and WHO, CDC,  
48 IOTF, DUTCH, and MULT BMI references were around puberty (138 to 150 months for boys;  
49 114 to 132 for girls). MULT ABMI presented S values similar to IOTF and DUTCH BMI  
50 references for boys 60 to 114 months and then became higher, approaching the MULT BMI S  
51 values from 198 to 240 months. For girls the MULT ABMI S values were close to the IOTF,  
52 CDC, and DUTCH from 60 to 110 months, and then became higher, approaching the MULT  
53 BMI S values until 240 months.

54 **Conclusion:** MULT ABMI presented an advantage in comparison to the existing BMI  
55 references because it takes into account the growth changes during puberty and is a new option  
56 to assess the nutritional status of multi-ethnic populations.

57

58 **Keywords:** Child; Adolescent; Nutrition Assessment; Growth Charts; Allometric Scaling,  
59 Longitudinal Studies.

60

## 61 **Introduction**

62 In the last decades, the prevalence of obesity has increased among all age groups and  
63 the Body Mass Index (BMI) has been widely used as the main tool to diagnose it at a  
64 population level [1–3]. BMI is an index, calculated by dividing the body mass (BM) in kilos  
65 (kg) by the squared height in meters (m) [4,5]. This index was developed by Lambert Adolphe  
66 Jacques Quetelet in 1832 based on the assumptions that weight increases proportionally to the  
67 square of height and the fat mass (FM) and fat-free mass (FFM) scale in a similar way to  
68 weight [4–6].

69 Nowadays, BMI-for-age growth charts are used internationally to assess the nutritional  
70 status of children and adolescents, despite some concerns about them [7]. One issue is the that  
71 BMI is a one-dimensional index, which applies a single exponent (2) to adjust the relation  
72 between height and weight [4,8,9]. This approach may not be adequate due to the non-uniform  
73 increase in body mass and height occurred in the physical growth process and sexual  
74 maturation [10–15].

75 During the pubertal stage, BMI can mislead the interpretation between adiposity gain  
76 and growth spurt, indicating a need for a multidimensional approach [11,12,16]. Even  
77 Quetelet's pioneering studies in human growth concluded that "weight gain equals the square of  
78 height", except for growth spurts which occur after birth and during puberty [5]. It is evident  
79 that during growth, BM does not strictly adhere to the squared height relationship, which can  
80 complicate its interpretation in individuals undergoing growth [16].

81 In this way, research on allometric scaling has gained importance in the nutritional  
82 status assessment of children and adolescents [9,16–19]. Allometry refers to changes in the  
83 relative dimensions of body parts that correlate with changes in overall size [9]. Additionally,  
84 analysis of American population data has suggested that the relationship between BM and  
85 height can be linearized by using the quadratic transformation of height [19]. Researchers have

86 noticed that many scale relationships could be linearized in a log-log scale through the linear  
87 equation:  $\log y = \alpha \log x + \log b$  [20]. Furthermore, in human allometry, there are situations  
88 where two measured variables are correlated without one directly determining the other,  
89 blurring the distinction between dependent and independent variables [21]. This is particularly  
90 evident in the relationship between BM and height, where each factor may influence the other  
91 to some degree, however the true height exponent may exceed the value of  $p$  determined by  
92 regression analysis [21].

93 The allometric scaling goal is to adjust the relationship between weight and height to  
94 represent body mass or body fat independent of height, which is the fundamental basis of the  
95 allometric body mass index (ABMI) [8,19,21]. ABMI consists in dividing the body mass (kg)  
96 by the height (m) powered by the coefficients of the allometric body mass per age ( $p_t$ ) [8].

97 At the moment, there are coefficients of allometric body mass proposed for  
98 international use [9]. These coefficients are age- and sex-specific and were calculated based on  
99 data from five countries (Brazil, United States, Mexico, South Korea, and England) [9].  
100 However, there are no international ABMI growth charts proposed for clinical practice, even  
101 though the ABMI seems to be a formula to adjust height in relation to weight, following human  
102 growth patterns across the ages [7,9].

103 Therefore, this study aimed to develop an ABMI-for-age growth reference and its  
104 respective percentiles based on recent longitudinal data from multi-ethnic populations (MULT  
105 ABMI Reference) and compare it to international BMI references/percentiles of the Dutch  
106 Growth Study (DUTCH/2011), the Centers for Disease Control and Prevention (CDC/2000),  
107 the World Health Organization (WHO/2007), the International Obesity Task Force  
108 (IOTF/2012) and the MULT (2023), which is a recent developed BMI-for-age growth chart  
109 derived from multi-ethnic populations [22–26].

110

111

112

## 113 **Methods**

### 114 **Study design and population**

115 Young Lives (YL), Millennium Cohort Study (MCS), Adolescent Nutritional  
116 Assessment Longitudinal Study (ELANA), and Epidemiological Health Investigation of  
117 Teenagers in Porto (EPITeen) datasets were used in this study, providing longitudinal data of  
118 children and adolescents born between 1990 and 2002 [27–30].

119 The YL is an international study that started in 2002 with children born in Ethiopia,  
120 India (Andhra Pradesh), Peru, and Vietnam [27]. Its surveys provide demographic, socio-  
121 economic, health, cognitive, physical development, and educational data [27]. YL is composed  
122 of two cohorts: a younger cohort (YLYC) with around 8 000 children born in 2001-2002 and an  
123 older cohort (YLOC) with about 4 000 children who were born in 1994-1995 [27]. Children  
124 from the YLYC were assessed at 1, 5, 8, 12, and 15 years of age, while the ones from the  
125 YLOC were assessed at 8, 12, 15, 19, and 22 years of age [27].

126 The MCS provides demographic and health-related data, measures concerning child  
127 development, cognitive ability, and educational attainment of the 18 827 children born in  
128 England, Scotland, Wales, and Northern Ireland [28]. The subjects of the MCS were evaluated  
129 at 9 months and at 3, 5, 7, 11, 14, and 17 years of age, because there was no height data in the  
130 baseline, in our study, we only included their data from the second sweep forward (n = 15 588)  
131 [28].

132 ELANA is a study composed of 1 848 adolescents born between the 1990s and 2000s  
133 and who lived in Rio de Janeiro (Brazil) between 2010 and 2013 [29]. The State University of  
134 Rio de Janeiro (UERJ) and the Federal University of Rio de Janeiro (UFRJ) coordinated this  
135 study and its participants were from four private and two public schools in the metropolitan

136 region of Rio de Janeiro [29]. In ELANA, there were two cohorts, one composed of middle  
137 school students (MS), and another of high school students (HS) [29]. The participants were  
138 assessed every school year, completing four evaluations for the MS and three evaluations for  
139 the HS [29].

140 The EPITeen is a population-based cohort of 2 942 adolescents who were born in 1990  
141 and who attended public and private schools in the city of Porto in Portugal in 2003/2004 [30].  
142 In addition to the recruitment at 13 years, follow-up evaluations took place at 17, 21, 24, and 27  
143 years of age, on average [30]. During its data collection, participants' anthropometric data at  
144 birth and during their childhood were retrieved from their health books, while additional body  
145 measure examinations were performed at all follow-ups [30,31].

146 Regarding the anthropometric examination, in all studies, children under two years old  
147 were measured in the supine position (length measurement), while children from two years old  
148 upward were measured in an upright position (height measurement) [27–31]. In order to assure  
149 the accuracy of the body measurement examination in the surveys, they were taken by health  
150 professionals who adhered to a standardized examination protocol [27–31].

151 These longitudinal studies provided data from about 32 162 participants and were  
152 conducted according to the guidelines laid down in the Declaration of Helsinki [27–30]. All  
153 participants and/or their parents or legal guardians provided written informed consent [27–30].  
154 Data from ELANA were gathered with permission of the UFRJ and the Institute of Social  
155 Medicine's Ethics Committee approved its study protocol (CAEE – 0020.0.259.000-09)  
156 [29,32]. Similarly, The Institute of Public Health of the University of Porto (ISPUP) authorized  
157 the retrieval of data from EPITeen, and the Ethics Committees of the Hospital São João  
158 approved the its study protocol [30,31,33].

159 Additionally, data from MCS and YL were gathered using the UK Data Service online  
160 platform and these studies have been approved by Ethics Committees [27,28,34–43]. The YL

161 study protocols have subsequently received ethical committee approval before each pilot and  
162 round of data collection from both the University of Oxford and the respective ethics  
163 committees in each study country [27]. The approvals are as follows: the Central University  
164 Research Ethics Committee (CUREC) of the Social Science Division at the University of  
165 Oxford (since 2005); the Instituto de Investigación Nutricional (IIN) in Peru (since 2002); the  
166 Hanoi School of Public Health Research in Vietnam (since 2015); the Centre for Economic and  
167 Social Studies (CESS) in Hyderabad, India (since 2015); and the College of Health at Addis  
168 Ababa University in Ethiopia (since 2015) [27].

169 Likewise, the MCS received ethical approval for each wave of data collection from  
170 different Medical Research Ethics Committees (MREC) across the UK [28]. For MCS1,  
171 approval was granted by the South West MREC (MREC/01/6/19) in 2000/1 [28]. MCS2 was  
172 approved by the London MREC (MREC/03/2/022) in 2003/4 [28]. The MCS3 wave received  
173 approval from the London MREC Committee (05/MRE02/46) in 2005/6 [28]. For MCS4, the  
174 Yorkshire MREC provided approval (07/MRE03/32) in 2007/8 [28]. MCS5 was approved by  
175 the Yorkshire and The Humber – Leeds East MREC (11/YH/0203) in 2011/12 [28]. Finally,  
176 MCS6 received approval from the London – Central MREC (13/LO/1786) in 2015/16 [28].

177

## 178 **Data processing and analysis**

179 In total, we excluded 14 715 subjects. In the selection data, firstly we excluded  
180 participants (n=177) who did not meet our eligibility requirements, which included being  
181 classified as belonging to one of the five ethnic categories (White, Black, Asian Indian, Native  
182 Peruvians, and East and Southeast Asians) and having received an assessment in all three  
183 sweeps of the ELANA HS or at least four sweeps for the other surveys.

184 Secondly, the following exclusions were performed: missing anthropometric and/or  
185 demographic data (n = 13 299 subjects), measurement errors, in which subjects decreased in

186 height ( $\geq 0.5$ cm) over the years ( $n=799$  subjects), and implausible values considered as height-  
187 for-age z-score below  $-6$  standard deviations (SD) or above  $+6$  SD or BMI-for-age z-score  
188 below  $-5$  SD or above  $+5$  SD ( $n=250$  subjects) [44].

189 Thirdly, ABMI values with less than 10 observations per age in months ( $n=334$ ) and  
190 outlier weight measurements at the population and individual levels were removed. At the  
191 population level, weight-for-age z-scores below  $-2$  SD or above  $+2$  SD ( $n=5\,672$  observations)  
192 were excluded from our data pool. This outlier exclusion was performed based on WHO weight  
193 reference values for children under the age of five and according to our sample weight values  
194 for participants from five years old [45].

195 At the individual level, an expected BMI was calculated for each participant's BMI data  
196 using a linear mixed-effects model [46]. This model was conducted using the *nlme* package in  
197 R, which permits layered random effects in fitting a linear mixed-effects model [46,47]. For the  
198 entire sample, BMI values that deviated below  $-2$ SD or above  $+2$ SD from the expected BMI  
199 values were excluded ( $n=4\,727$  observations). These exclusions were based on BMI values that  
200 were considered outliers within their respective subjects.

201 For this new growth reference for children aged 5 years and older the values of the  
202 ABMI were calculated using the formula proposed by Benn (1971), and the  $p_t$  coefficients,  
203 which are the exponents per month applied in the formula, were derived from the dataset  
204 compiled by Mazzeti (2018) [8,48]. This dataset included individuals aged 0 to 19 years,  
205 measured in months, from five countries (Brazil, South Korea, Mexico, England, and the  
206 United States), enabling a multiethnic analysis [9,48].

207 Initially, individuals with body mass and height values that were below  $-2$ SD or above  
208  $+2$ SD within their respective age groups and sexes were excluded [9,48]. Body mass and height  
209 values were then transformed to a natural logarithmic scale to achieve maximum  
210 homoscedasticity in the distributions [9,48]. After-transformation, the data were fitted into a



211 log–log linear regression model defined as  $\log(\text{body mass}) = \alpha \times \beta(\text{height})$  [9,48].  
212 Subsequently, the  $p_t$  coefficients were calculated from the combined dataset of all five  
213 countries using a spline modeling technique (5 knots not determined a priori) [9,48].

214 Additionally, an analysis of variation among ethnic groups was conducted using mixed-  
215 effects models to investigate the intraclass coefficient of variation of individual height, body  
216 mass (calculated by the residual of linear regression of weight on height to estimate body mass  
217 not predicted by bone mass), BMI, and ABMI [48]. Overall, the mixed-effects analyses  
218 demonstrate that the greatest variability was observed in height measurements across different  
219 epidemiological contexts, while the ABMI showed a practically null variation among the  
220 studied ethnicities [48]. This suggested that ABMI was independent of height and showed no  
221 effect of contextual ethnic variability, highlighting its potential as an international index with  $p_t$   
222 coefficients specified only for age and sex [48].

223 These  $p_t$  coefficients were applied for boys from 5 to 18 years old and for girls from 5  
224 to 16 years old. For boys older than 18 and girls older than 16, the exponent of 2 was applied.  
225 The decision of applying the exponent of 2 for girls earlier than boys was made since studies  
226 point out that puberty occurs first in girls, which stabilizes their growth earlier, thus, there was  
227 no need to adjust their  $p_t$  coefficient after that [16,19,49].

228 The MULT ABMI-for-age growth charts were modeled from five to 22 years old and  
229 specified by sex (defined at birth by the presence or absence of a Y chromosome). This age  
230 group was chosen to ensure that the sample's final height would be achieved since boys can still  
231 gain some height after the age of 18 [16,50,51]. MULT ABMI growth charts were constructed  
232 through the Generalized Additive Models for Location Scale and Shape (GAMLSS) approach,  
233 and the LMS method [52,53]. Moreover, the model class defined by the Box-Cox Cole Green  
234 distribution with penalized splines as the smoothing function was chosen for the distribution  
235 parameters L (skewness), M (median), and S (coefficient of variation) [53]. Considering that

236 each penalized spline has a set of degrees of freedom (df) and can produce a variety of results  
237 based on the df range selection, the df of the L, M, and S parameters were selected using the  
238 Bayesian Information Criterion (BIC) to prevent overfitting [54,55]. For both sexes, the  
239 following df ranges were tested: L = 0-1, M = 0-4, and S = 0-3; then the one that presented the  
240 lowest BIC values was chosen (L=1; M=4; S=3). Furthermore, the Rigby and Stasinopoulos  
241 algorithm was used to fit the final model's L, M, and S parameters [53,56].

242 The underweight, overweight, and obesity percentile cutoffs of the MULT ABMI  
243 growth charts were derived at ages 17, 18, 19, and 20 for girls and at ages 18, 19, and 20 for  
244 boys, using the values of 17 kg/m<sup>2</sup>, 25 kg/m<sup>2</sup>, and 30 kg/m<sup>2</sup>, respectively. The cutoff at 17 years  
245 old was estimated only for girls, since they stabilize growth and body mass before boys,  
246 suggesting that the cutoff can be established earlier for them [16,49,50]. The BMI values of 25  
247 kg/m<sup>2</sup> and 30 kg/m<sup>2</sup> were selected because they were recommended by WHO as cutoff values  
248 to establish overweight and obesity in adults [3]. In addition, they were also used as cut-off  
249 values in DUTCH, WHO, IOTF, and MULT BMI references [22,24–26]. Similarly, the value  
250 of 17 kg/m<sup>2</sup> was chosen to define underweight in our growth charts, since other BMI  
251 references, such as MULT, WHO, IOTF, and DUTCH, also use this value as a cut-off point for  
252 underweight [22,24–26].

253 The comparison between the CDC, WHO, IOTF, DUTCH, and MULT BMI and MULT  
254 ABMI growth charts was performed describing their trajectory based on the 50<sup>th</sup> percentile (M  
255 curve), and the differences between BMI Z-scores from the other charts and ABMI Z-score  
256 were calculated, assuming ABMI as reference. Furthermore, the S and L curves, and the  
257 percentile curves for obesity established using the cutoff points at 18, 19, and 20 years old of  
258 these growth references have been described.

259 Concerning the L, M, and S curve model fit, the ABMI median, coefficient of variation,  
260 Box-Cox transformation parameter (L curve gross values), and worm plots developed by Van

261 Buuren and Fredriks were applied [53,57]. All statistical analyses were performed in R version  
262 4.2.1 for Windows and the RefCurve Software was used for estimating the MULT ABMI-for-  
263 age reference values [55,58].

264

265

## 266 **Results**

267 After the exclusion of BMI value outliers and subjects who did not meet our eligibility  
268 criteria, 65 644 ABMI values (51.31% from boys) of 17 447 subjects (boys = 51.01%) were  
269 used in the MULT ABMI reference construction, as shown in Fig 1. The largest ethnic group of  
270 our sample was White (48.69%), followed by Asian Indian (14.10%), Black (13.39%), East and  
271 Southeast Asians (12.57%), and Native Peruvian (11.25%). The ABMI observations per sex  
272 and age groups are presented in Table 1.

273

### 274 **Fig 1. Flowchart of the subject and anthropometric data selection**

275 n: number of participants

276 obs: number of observations

277 Measurement Errors: children and adolescents who had decreased their height over the years

278 Implausible values: height-for-age z-score below  $-6$  SD or above  $+6$  SD or BMI-for-age z-  
279 score below  $-5$  SD or above  $+5$  SD.

280 Outliers at the population level: weight-for-age z-score below  $-2$ SD or above  $+2$ SD (based on  
281 the WHO reference values for children under five years old and based on the weight of our  
282 sample for children from five years old and older.

283 Outliers at the individual level: BMI-for-age z-score below  $-2$ SD or above  $+2$ SD (based on the  
284 BMI values of the linear mixed effects model).

285

286 **Table 1. Number of observations per age group and sex included in the construction of**  
287 **the LMS parameters of the MULT ABMI reference.**

288

| Age (year) | Boys (obs) | Girls (obs) |
|------------|------------|-------------|
| 5 to < 6   | 5 190      | 4 972       |
| 6 to < 7   | 577        | 574         |
| 7 to < 8   | 4 641      | 4 466       |
| 8 to < 10  | 2 388      | 2 049       |
| 10 to < 11 | 979        | 984         |
| 11 to < 12 | 3 973      | 3 846       |
| 12 to < 13 | 3 033      | 2 735       |
| 13 to < 14 | 1 178      | 1 267       |
| 14 to < 15 | 4 259      | 4 040       |
| 15 to < 16 | 2 811      | 2 540       |
| 16 to < 17 | 1 079      | 1 147       |
| 17 to < 18 | 1 857      | 1 915       |
| 18 to < 22 | 1 430      | 1 430       |
| Total      | 33 395     | 31 965      |

obs = Number of observations.

289

290 The MULT ABMI LMS reference values and the ABMI p-coefficients (ABMI<sub>p</sub>) per  
291 age and sex proposed by Mazzeti et al. (2018) [9] are presented in Table 2. These coefficients  
292 were higher in girls than boys from 60 months to 84 months and between 108 to 132 months.  
293 On the other hand, at 132 months of age, the boys started to present higher p-coefficient values

294 than girls, until 216 months (18 years old), when both had the isometric exponent (2), as shown  
 295 in Fig 2.

296

297 **Table 2. MULT ABMI LMS reference values and ABMI p-coefficients specified by age**  
 298 **for boys and girls.**

299

| Age<br>(months) | Boys    |         |        |                    | Girls   |         |        |                    |
|-----------------|---------|---------|--------|--------------------|---------|---------|--------|--------------------|
|                 | L       | M       | S      | ABMI <sub>pt</sub> | L       | M       | S      | ABMI <sub>pt</sub> |
| 60              | -0.4918 | 15.4386 | 0.0895 | 2.2                | -0.6352 | 15.1841 | 0.0911 | 2.3                |
| 66              | -0.5636 | 15.1110 | 0.0922 | 2.2                | -0.6553 | 14.9207 | 0.0948 | 2.3                |
| 72              | -0.6343 | 14.7741 | 0.0949 | 2.4                | -0.6746 | 14.6464 | 0.0986 | 2.5                |
| 78              | -0.7030 | 14.4144 | 0.0979 | 2.4                | -0.6923 | 14.3385 | 0.1026 | 2.5                |
| 84              | -0.7684 | 14.0174 | 0.1011 | 2.6                | -0.7073 | 13.9695 | 0.1069 | 2.6                |
| 90              | -0.8297 | 13.5933 | 0.1047 | 2.6                | -0.7189 | 13.5426 | 0.1116 | 2.6                |
| 96              | -0.8860 | 13.1675 | 0.1087 | 2.8                | -0.7266 | 13.0856 | 0.1167 | 2.8                |
| 102             | -0.9373 | 12.7832 | 0.1129 | 2.8                | -0.7306 | 12.6601 | 0.1222 | 2.8                |
| 108             | -0.9831 | 12.4651 | 0.1173 | 2.9                | -0.7311 | 12.3132 | 0.1280 | 3.0                |
| 114             | -1.0231 | 12.2089 | 0.1218 | 2.9                | -0.7284 | 12.0620 | 0.1339 | 3.0                |
| 120             | -1.0567 | 12.0023 | 0.1263 | 3.0                | -0.7228 | 11.9165 | 0.1398 | 3.1                |
| 126             | -1.0836 | 11.8326 | 0.1306 | 3.0                | -0.7145 | 11.8864 | 0.1455 | 3.1                |
| 132             | -1.1036 | 11.6934 | 0.1346 | 3.1                | -0.7039 | 11.9847 | 0.1506 | 3.0                |
| 138             | -1.1166 | 11.5986 | 0.1381 | 3.1                | -0.6919 | 12.2430 | 0.1550 | 3.0                |
| 144             | -1.1233 | 11.5928 | 0.1412 | 3.0                | -0.6796 | 12.7195 | 0.1583 | 2.8                |
| 150             | -1.1245 | 11.7107 | 0.1438 | 3.0                | -0.6684 | 13.4403 | 0.1603 | 2.8                |

|     |         |         |        |     |         |         |        |     |
|-----|---------|---------|--------|-----|---------|---------|--------|-----|
| 156 | -1.1210 | 11.9687 | 0.1460 | 2.9 | -0.6587 | 14.3865 | 0.1609 | 2.5 |
| 162 | -1.1133 | 12.3574 | 0.1479 | 2.9 | -0.6504 | 15.4798 | 0.1605 | 2.5 |
| 168 | -1.1020 | 12.8576 | 0.1496 | 2.7 | -0.6428 | 16.6158 | 0.1591 | 2.2 |
| 174 | -1.0879 | 13.4674 | 0.1510 | 2.7 | -0.6358 | 17.7094 | 0.1570 | 2.2 |
| 180 | -1.0719 | 14.1891 | 0.1524 | 2.5 | -0.6292 | 18.6986 | 0.1545 | 1.9 |
| 186 | -1.0546 | 15.0236 | 0.1535 | 2.5 | -0.6234 | 19.5560 | 0.1521 | 1.9 |
| 192 | -1.0359 | 15.9401 | 0.1544 | 2.3 | -0.6180 | 20.2647 | 0.1499 | 2.0 |
| 198 | -1.0150 | 16.8787 | 0.1550 | 2.3 | -0.6123 | 20.8158 | 0.1483 | 2.0 |
| 204 | -0.9910 | 17.7793 | 0.1552 | 2.1 | -0.6058 | 21.2096 | 0.1473 | 2.0 |
| 210 | -0.9631 | 18.5937 | 0.1549 | 2.1 | -0.5981 | 21.4565 | 0.1469 | 2.0 |
| 216 | -0.9315 | 19.3111 | 0.1540 | 2.0 | -0.5896 | 21.5852 | 0.1470 | 2.0 |
| 222 | -0.8964 | 19.9401 | 0.1527 | 2.0 | -0.5809 | 21.6314 | 0.1473 | 2.0 |
| 228 | -0.8586 | 20.5068 | 0.1510 | 2.0 | -0.5728 | 21.6344 | 0.1478 | 2.0 |
| 234 | -0.8187 | 21.0334 | 0.1492 | 2.0 | -0.5659 | 21.6221 | 0.1481 | 2.0 |
| 240 | -0.7772 | 21.5366 | 0.1471 | 2.0 | -0.5604 | 21.6115 | 0.1482 | 2.0 |

---

300 L: Skewness

301 M: Median BMI (50th percentile)

302 S: Coefficient of Variation

303 ABMI<sub>p</sub>: allometric body mass index p-coefficients estimated by Mazzeti et al. (2018) [9].

304

305 **Fig 2. Allometric body mass index p-coefficient values for boys and girls.**

306 Coefficients of ABMI were previously estimated by Mazzeti et al. (2018) [9].

307

308           The comparison between the MULT ABMI and the other BMI references through the  
309 differences in body mass z-scores and their trajectories based on the M curve are shown in Fig  
310 3. The MULT ABMI M values were lower than the all-BMI references from 64 to 234 months  
311 for boys and from 61 to 189 months for girls. The greatest differences between M curves were  
312 from 138 to 150 months for boys and from 114 to 132 for girls, which coincides with the  
313 puberty stage. The DUTCH and CDC BMI references presented the highest z-score differences  
314 to the MULT ABMI, while the MULT BMI and IOTF presented the closest values.

315

316 **Fig 3. M curve and z-score differences of the five BMI references and the MULT ABMI**  
317 **reference in boys and girls.**

318

319           The S and L curves of the different growth references are shown in Fig 4. WHO S  
320 values were the lowest from 81 to 198 months, while MULT BMI S values were the greatest  
321 from 72 to 240 months. MULT ABMI presented S values similar to IOTF and DUTCH BMI  
322 references for boys from 60 to 114 months and then became higher, approaching the MULT  
323 BMI S values from 198 to 240 months. For girls, the MULT ABMI presented S values close to  
324 the IOTF, CDC, and DUTCH from 60 to 110 months, and then became higher, approaching the  
325 S values of MULT BMI until 240 months. Regarding the skewness, the L curve of MULT  
326 ABMI and BMI were more symmetric than the other BMI references, presenting the closest  
327 values to 0, while CDC presented the most asymmetric shape with values lower than -3.

328

329 **Fig 4. S and L curves of the five BMI references and the ABMI reference in boys and**  
330 **girls.**

331

332 In the comparison of the obesity percentile curves between the different references with  
333 cutoff points applied at 18 years old (216 months), the ones of MULT BMI and ABMI were  
334 below the IOTF and DUTCH BMI curves for both sexes, as shown in Fig 5. On the contrary,  
335 for the obesity percentile curves estimated applying the cutoff at 19 years old (228 months) the  
336 MULT BMI obesity percentile curve for the boys was above the WHO curve, while for girls it  
337 was very close until the age range of 156 to 216 months when the largest distance between  
338 these two obesity percentile curves is observed (Fig 5).

339

340 **Fig 5. BMI percentile cutoffs for obesity at 18, 19, and 20 years old of the five BMI**  
341 **references and the ABMI reference in boys and girls.**

342 I - BMI value of  $30\text{kg/m}^2$  applied as the cutoff for obesity at 18 years old

343 II - BMI value of  $30\text{kg/m}^2$  applied as the cutoff for obesity at 19 years old

344 III - BMI value of  $30\text{kg/m}^2$  applied as the cutoff for obesity at 20 years old

345

346 It is important to highlight that the MULT ABMI obesity percentile curve at 19 years  
347 old was below the others in the majority of the ages, surpassing the MULT BMI curve only for  
348 girls after 180 months of age and being above the WHO after 198 months. The MULT BMI  
349 and ABMI obesity percentile curves estimated by applying the cutoff points at 20 years old  
350 (240 months) were below the CDC curve for both sexes. The MULT ABMI growth charts for  
351 boys and girls are presented in Figs 6 and 7, respectively.

352

353 **Fig 6. ABMI-for-age growth chart for boys aged 0 to 20 years old.**

354

355 **Fig 7. ABMI-for-age growth chart for girls aged 0 to 20 years old.**

356



357 Concerning the model fit of the MULT ABMI reference, the worm plots presented in  
358 S1 and S2 Figs showed that there were no deviations from the model's assumptions, which  
359 indicates a good fit of the models.

360

361

## 362 **Discussion**

363 This study developed a MULT ABMI reference using allometric scaling to adjust the  
364 relation between weight and height. Several studies showed that indexes such as BMI  
365 ( $\text{weight}/\text{height}^2$ ) and ponderal ( $\text{weight}/\text{height}^3$ ) might not adjust well the relation between  
366 weight and height in some life cycle stages, and therefore this new reference would be a new  
367 approach to assess the nutritional status of children and adolescents [16–18,59].

368 BMI is widely used across populations, even though some researchers pointed out that  
369 the use of the same exponent to adjust the relation between weight and height for all age groups  
370 would not be adequate since there are changes in growth velocity and body composition during  
371 development [16,59]. From the first year of life until puberty, the weight gain increases slowly  
372 nearly as the square of the height, while during puberty there is an increase in the weight gain,  
373 stopping after age 25 years [4,16]. For this reason, Benn (1971) proposed an index with  
374 dynamic exponents that express the value for linearizing weight and height relation across age  
375 for each sex [8]. Accordingly, the exponent applied should provide the best correlation to  
376 weight and be uncorrelated with height [8]. This exponent should ensure the highest correlation  
377 between the index and adiposity combined with zero correlation between the index and height,  
378 being a value no higher than 3, and not necessarily an integer number [9].

379 During puberty, there is evidence that the exponent 2 applied in the BMI would not be  
380 enough to adjust the relation between weight and height [59]. Similar results were found by  
381 Cole (1986) that concluded that exponent 2 adjusts well the relation between weight and height

382 for preschool children and adolescents after puberty, while during puberty this value should be  
383 increased to around 3 [16]. Additionally, Cole (1986) observed that, as a consequence of the  
384 pubertal process, girls experience their highest growth velocity 18 months earlier than boys  
385 [16]. This leads them to exhibit higher exponent values before boys, which adjusts the relation  
386 between weight and height [16]. A similar pattern was found by Mazzeti et al. (2018); in their  
387 study, the highest exponents were found in girls 12 months before the boys [9]. The  
388 explanation for that is that sexual maturation is the main factor for increasing this exponent, so  
389 as it occurs before in girls than boys, it is expected that they have the highest p-coefficients first  
390 [16,19,49]. Moreover, another study highlighted that height correlates to sexual maturation,  
391 therefore an adequate index should be independent of the height and correlated to adiposity as  
392 mentioned as an assumption of an ideal index [8,9,12,16].

393         These findings are important for understanding the premises of each index. For  
394 example, the BMI was not proposed as a way of predicting body fat, but rather as an index of  
395 the relation between weight and height [4,5]. The BMI's association/correlation with obesity-  
396 related diseases has led to its wide use as a diagnostic tool for obesity screening [4,60]. For  
397 adolescents, the challenge is to have an index that adjusts the height in relation to the weight,  
398 taking into account the changes in growth velocity, body composition, fat, and weight gain and  
399 keeping the independence of the index from height, especially during puberty [61].  
400 Unfortunately, BMI does not adjust it well during puberty, therefore the use of allometric  
401 scaling is suggested instead [9,16].

402         In the MULT ABMI reference rather than modeling the index, the fundamental relation  
403 between the weight and height during growth was modeled through the adjustments in the  
404 exponents, which were specified, by sex and age. During the 19<sup>th</sup> century, Quetelet in his  
405 studies about body mass and growth indicated that in adolescents weight scales to height  
406 powered by at least 2.5 [5,62]. For this reason, correctly interpreting and use of body mass

407 indexes have gained importance in the last years, especially to adjust weight and height to  
408 represent body mass or body fat independent of height [19,21,63–67].

409         Studies pointed out that the adjustment of this relation is important to obtain a BMI  
410 independent of height, an estimate of body fat regardless of the individual's size, an indirect  
411 increase in the association between body mass and body fat, and the improvement of the  
412 precision and accuracy of nutritional diagnosis based on body mass [19,21,63–67].  
413 Furthermore, the concept of shape is based on the premise that one dimension grows  
414 proportionally to the others and therefore its measurement is given by the ratio of two  
415 dimensions, which could be called volume [68]. According to Eveleth & Tanner (1991), this  
416 way of measuring shape can be an issue, as only two dimensions are considered and it can  
417 reduce the accuracy of the evaluation of the final index [68]. This is because, for example,  
418 dividing body mass by height does not take into account that the concept of shape is very close  
419 to the concept of volume, and would be necessary to place it in a quadratic or cubic scale  
420 [69,70].

421         In this way, considering the concept of body area and volume, the height measurement  
422 is intrinsically contained in the weight measurement, and to transform these two measurements  
423 into an index that assesses nutritional status, it is necessary to interpret that there are two  
424 vectors affecting growth and gain simultaneously [9]. These vectors are the chronological  
425 vector (linear growth and weight gain); and the biological vector (time, and translating growth  
426 velocity by different determinants) [13,14]. Therefore, in the BM analysis, the purpose is to use  
427 both proportions through an exponent, that could make the ratio independent of its  
428 denominator, regressing the measure of the numerator, which is the case of the BMI, calculated  
429 with the exponent equal to 2, for all individuals [9].

430         Regarding growth patterns, collecting data across diverse human populations, especially  
431 in small-scale populations, remains challenging [71]. In addition to that, there is an ongoing

432 debate about the extent to which environmental factors influence these growth patterns [71].  
433 For instance, studies conducted by Hruschka et al. (2019) and Wells (2017) suggest that some  
434 differences in height and weight cannot be explained mainly by environmental factors [72,73].  
435 In the Hruschka et al. (2019) study these differences likely stem from a combination of  
436 unmeasured environmental and genetic factors [72]. Failing to consider these factors can lead  
437 to misinterpretations of phenotypic variations as indicators of socioeconomic and  
438 environmental disparities [72]. Wells (2017) pointed out that while adult height has a  
439 significant heritable component, the specific pathway through which it is attained also has  
440 substantial implications for metabolic phenotype [73].

441         Moreover, a study conducted with the Shuar, an indigenous Amazon population,  
442 revealed that their physical growth exhibited lifelong small stature and growth patterns that  
443 diverge significantly from the international standards/references of WHO (2006/2007) and  
444 CDC (2000), particularly after early childhood and around puberty [23,24,45,71]. This distinct  
445 growth pattern is due to the phenotypic plasticity and genetic selection in response to local  
446 environmental and life history factors, including a high burden of infectious diseases and high  
447 rates of mortality, which likely explain many aspects of Shuar growth [71]. Indigenous  
448 populations represent a significant portion of human genetic and cultural diversity but are often  
449 underrepresented in studies on childhood growth [74–76].

450         On the other hand, several studies have identified nutritional inadequacy and infectious  
451 diseases as the primary factors contributing to slow childhood growth and delayed maturation  
452 [44,77–79]. In this way, while some researchers have suggested that relying on a single  
453 international reference may not be appropriate for assessing growth worldwide, especially due  
454 to the varied growth patterns among non-Western and indigenous groups, it has been  
455 demonstrated that the lack of ethnicity diversity in these growth references may be the  
456 underlying issue [7,80–89].

457           Therefore, an advantage of the MULT ABMI reference is the inclusion of populations  
458 that have been underrepresented in the development of international growth references [26,51].  
459 These populations include Africans (Ethiopians), South American Natives, various Asian  
460 groups (Indians and Vietnamese), and samples from multiethnic countries like Brazil, which  
461 exhibit a wide range of ethnicities [26,51]. Corroborating to it, some authors point out a need  
462 for combining data from different populations when estimating growth references to be used  
463 worldwide [25,45,80,90]. Another benefit was the use of longitudinal data, which considered  
464 the differences across the ethnic groups and allowed us to assess their growth trajectories over  
465 the years, especially during puberty [91].

466           Regarding the S curves, when compared to MULT growth references, WHO, CDC and  
467 IOTF presented lower coefficients of variation, especially during adolescence, a period when  
468 the growth spurt and the development of the genitals and secondary sex characteristics occur  
469 [49]. One possible explanation for that is the ethnic diversity lack in the IOTF, WHO, and CDC  
470 growth references [7,23,24,80]. WHO and CDC BMI references used data only from the  
471 United States, while in the IOTF BMI reference, African countries were absent in their sample  
472 population, as highlighted as a limitation of the IOTF growth charts [7,23,24,80]. As an  
473 example of that, a study conducted with school-age children pointed out that IOTF growth  
474 charts presented obesity misclassification for Ghanaian children in comparison with the  
475 deuterium dilution method [92].

476           Furthermore, another advantage of the MULT ABMI reference was to cover all the first  
477 years of early adulthood in its modeling, which was not done in the IOTF growth reference  
478 [80]. This is an important factor, since there is some evidence that boys grow even after 18  
479 years old, and cutoffs established before 19 or 20 years can generate greater sex differences in  
480 the cutoffs [50,51,80,93]. Moreover, some authors suggest that the adult BMI cutoff points  
481 proposed by the WHO (2000) should be used only after 19 years old [3,24,94].

482           Concerning the underweight, overweight, and obesity cutoffs, the MULT ABMI  
483 reference presented options estimated from the BMI cutoffs at 17, 18, 19, and 20 years old.  
484 These ages are commonly applied as the upper limit for the international BMI growth charts  
485 [22–26,80,90]. Similarly, the BMI value of 30 kg/m<sup>2</sup> is commonly applied to determine the  
486 obesity percentile cutoff in international BMI references [22,24–26,80,90]. This obesity cutoff  
487 point is well known as a risk factor for developing some types of cancers, non-communicable  
488 diseases such as diabetes, cardiovascular disease, and some respiratory, chronic  
489 musculoskeletal, infertility, and skin problems [3]. Another advantage of the MULT ABMI  
490 reference is to provide curves based on different cutoff options, because it generates the  
491 opportunity for each country to test the one that best suits its population according to its  
492 national growth patterns.

493           Regarding the strengths of this study, it is the first one to propose an international  
494 growth reference based on the ABMI, instead of using the BMI, which has limitations for the  
495 weight to height relation in some age groups. Additionally, we used standardized longitudinal  
496 surveys with a large sample and higher ethnicity diversity, as well as advanced techniques to  
497 predict the MULT ABMI reference values and to avoid outlier effects. Moreover, rather than  
498 self-reported data, the anthropometric data were gathered by trained experts, which is supposed  
499 to reduce the odds of measurement errors and social desirability bias [44]. To ensure data  
500 quality and model reliability, a large sample size with almost equal distributions of boys and  
501 girls, as well as the exclusion of the outlier measures, were used. Cole's LMS approach,  
502 GAMLSS, and worm plots were also utilized, which are well-known techniques used in the  
503 growth reference constructions and supported by other studies [22,26,95,96].

504           Nevertheless, there are certain limitations in our study, including the absence of a health  
505 status evaluation and the fact that some samples, like those from Brazil and Portugal, were not  
506 national samples. However, BMI value outliers in the population and individual levels were

507 removed to ensure a sample that had not been compromised by excessive weight, even if there  
508 was no evaluation of health status. Concerning the use of city data, EPITeen is a population-  
509 based study from the city of Porto, which presented similar patterns to the national data [30,97].  
510 On the other hand, ELANA is comprised of a convenience sample of subjects from Rio de  
511 Janeiro [29]. This city has over 15% of immigrants, mostly from different Brazilian states,  
512 presenting demographic characteristics close to the national data [98,99].

513

514

## 515 **Conclusion**

516 For the first time, an international ABMI reference (MULT) based on longitudinal data  
517 of multi-ethnic populations from ten countries was constructed and presented. The MULT  
518 ABMI reference presented values close to IOTF and MULT BMI references, which are growth  
519 charts constructed with multiethnic populations. The puberty stage was the period when the  
520 MULT ABMI M curve presented the highest disparity compared to the M curve of the other  
521 BMI references. Despite that, there are similarities in the S and L curves of these growth  
522 references. These findings highlighted that the MULT ABMI reference keeps the essential  
523 similarities to the international BMI references, with the exception of the pubertal period when  
524 the exponent of the index seems to adjust the relation between weight and height better,  
525 supporting that the MULT ABMI reference could be a useful tool to assess the nutritional  
526 status of children and adolescents worldwide.

527

528

529

530

531

532

## 533 **Acknowledgements**

534           The authors are grateful to children and families who participate in the YL, MCS,  
535 ELANA, and EPITeen studies and to the UK Data Service, the UERJ, the UFRJ, and the  
536 ISPUP for making these datasets available to researchers. The authors would also like to thank  
537 the Department of Pediatric Cardiology of the University of Bonn for making the RefCurv  
538 software free to the scientific community.

539

540

541

542

543

544

545

546

547

548

549

550

551

552

553

554

555

556



557

## 558 **References**

- 559 1. Cockrell Skinner A, Ravanbakht SN, Skelton JA, Perrin EM, Armstrong SC, Skinner C.  
560 Prevalence of Obesity and Severe Obesity in US Children. *Pediatrics*. 2018;141:  
561 e20173459. doi:10.1542/peds.2017-4078.Skinner
- 562 2. Ogden CL, Carroll MD, Lawman HG, Fryar CD, Kruszon-Moran D, Kit BK, et al.  
563 Trends in obesity prevalence among children and adolescents in the United States, 1988-  
564 1994 through 2013-2014. *JAMA - Journal of the American Medical Association*.  
565 2016;315: 2292–2299. doi:10.1001/jama.2016.6361
- 566 3. WHO Consultation on Obesity. *Obesity: preventing and managing the global epidemic*.  
567 Geneva; 2000.
- 568 4. Eknoyan G. Adolphe Quetelet (1796-1874) - The average man and indices of obesity.  
569 *Nephrology Dialysis Transplantation*. 2008;23: 47–51. doi:10.1093/ndt/gfm517
- 570 5. Quetelet LAJ. *Physique sociale ou essai sur le developpement des facultés de l’homme*.  
571 Bruxelles: Muquardt C, Paris: Baillièr J, St. Petersburg: Issakoff J, editors. Bruxelles: C.  
572 Muquardt; 1869.
- 573 6. Chung S. Body mass index and body composition scaling to height in children and  
574 adolescent. *Ann Pediatr Endocrinol Metab*. 2015;20: 125–129.  
575 doi:10.6065/apem.2015.20.3.125
- 576 7. De Oliveira MH, Dos Santos Pereira D, Melo DS, Silva JC, Conde WL. Accuracy of  
577 international growth charts to assess nutritional status in children and adolescents: a  
578 systematic review. *Revista Paulista de Pediatria*. 2022;40: e2021016. doi:10.1590/1984-  
579 0462/2022/40/2021016
- 580 8. Benn RT. Some mathematical properties of weight-for-height indices used as measures  
581 of adiposity. *Br J Prev Soc Med*. 1971;25: 42–50.

- 582 9. Mazzeti CM da S, Cumpian Silva J, Rinaldi AEM, Conde WL. The allometric scaling of  
583 body mass and height in children and adolescents in five countries. *American Journal of*  
584 *Human Biology*. 2018;30: e23101. doi:10.1002/ajhb.23101
- 585 10. Bini V, Celi F, Berioli MG, Bacosi ML, Stella P, Giglio P, et al. Body mass index in  
586 children and adolescents according to age and pubertal stage. *Eur J Clin Nutr*. 2000;54:  
587 214–218. doi:10.1038/sj.ejcn.1600922
- 588 11. Cumpian-Silva J, Rinaldi AEM, Mazzeti CMDS, Conde WL. Body phenotypes in  
589 adolescence and sexual maturation. *Cad Saude Publica*. 2018;34: e00057217.  
590 doi:10.1590/0102-311x00057217
- 591 12. Cumpian-Silva J, Rinaldi AEM, Guedes Vasconcelos FDA, Assis MAA, Mazzeti CM,  
592 De Oliveira MH, et al. Body phenotypes and sexual maturation in Brazilian and US  
593 adolescents: Evidence for a change in body mass index Category. *Public Health Nutr*.  
594 2021;24: 5387–5399. doi:10.1017/S1368980020004589
- 595 13. Gould SJ. Geometric similarity in allometric growth: A contribution to the problem of  
596 scaling in the evolution size. *Am Nat*. 1971;105: 113–136. doi:doi.org/10.1086/282710
- 597 14. Günther B, Morgado E. Theory of biological similarity revisited. *J Theor Biol*. 1982;96:  
598 543–559. doi:10.1016/0022-5193(82)90230-2
- 599 15. Wang Y. Is Obesity Associated With Early Sexual Maturation? A Comparison of the  
600 Association in American Boys Versus Girls. *Pediatrics*. 2002;110: 903–910.  
601 doi:10.1542/peds.110.5.903
- 602 16. Cole TJ. Weight/height  $p$  compared to weight/height  $2$  for assessing adiposity in  
603 childhood: influence of age and bone age on  $p$  during puberty. *Ann Hum Biol*. 1986;13:  
604 433–451. doi:https://doi.org/10.1080/03014468600008621

- 605 17. Cole TJ, Henson GL, Tremble JM, Colley V. Birthweight for length: ponderal index,  
606 body mass index or Benn index? *Ann Hum Biol.* 1997;24: 289–298.  
607 doi:10.1080/03014469700005032
- 608 18. Heymsfield SB, Gallagher D, Mayer L, Beetsch J, Pietrobelli A. Scaling of human body  
609 composition to stature: New insights into body mass index<sup>1–3</sup>. *American Journal of*  
610 *Clinical Nutrition.* 2007;86: 92–91. doi:10.1093/ajcn/86.1.82
- 611 19. Heymsfield SB, Heo M, Thomas D, Pietrobelli A. Scaling of body composition to  
612 height: relevance to height-normalized indexes. *Am J Clin Nutr.* 2011;93: 736–740.  
613 doi:10.3945/ajcn.110.007161
- 614 20. Huxley JS, Teissier G. Terminology of Relative Growth. *Nature.* 1936;137: 780–781.  
615 doi:10.1038/137780b0
- 616 21. Burton RF. Human allometry: Adult bodies are more nearly geometrically similar than  
617 regression analysis has suggested. *Med Hypotheses.* 2010;74: 15–17.  
618 doi:10.1016/j.mehy.2009.08.009
- 619 22. Schönbeck Y, Talma H, von Dommelen P, Bakker B, Buitendijk SE, HiraSing RA, et al.  
620 Increase in prevalence of overweight in Dutch children and adolescents: A comparison  
621 of nationwide growth studies in 1980, 1997 and 2009. *PLoS One.* 2011;6: e27608.  
622 doi:10.1371/journal.pone.0027608
- 623 23. Kuczmarski R, Ogden C, Guo S. 2000 CDC Growth Charts for the United States:  
624 Methods and Development. *Vital Heal Stat.* 2002. doi:10.1590/S1516-  
625 35982002000600018
- 626 24. De Onis M, Onyango AW, Borghi E, Siyam A, Nishida C, Siekmann J. Development of  
627 a WHO growth reference for school-aged children and adolescents. *Bull World Health*  
628 *Organ.* 2007;85: 660–667. doi:10.2471/BLT.07.043497

- 629 25. Cole TJ, Lobstein T. Extended international (IOTF) body mass index cut-offs for  
630 thinness, overweight and obesity. *Pediatr Obes.* 2012;7: 284–294. doi:10.1111/j.2047-  
631 6310.2012.00064.x
- 632 26. De Oliveira MH, Araújo J, Severo M, Rodrigues KAS, Conde WL. MULT: A new BMI  
633 reference to assess nutritional status of multi-ethnic children and adolescents. *American*  
634 *Journal of Human Biology.* 2023; e23946. doi:10.1002/ajhb.23946
- 635 27. Barnett I, Ariana P, Petrou S, Penny ME, Duc LT, Galab S, et al. Cohort profile: The  
636 young lives study. *Int J Epidemiol.* 2013;42: 701–708. doi:10.1093/ije/dys082
- 637 28. Connelly R, Platt L. Cohort profile: UK Millennium Cohort Study (MCS). *Int J*  
638 *Epidemiol.* 2014;43: 1719–1725. doi:10.1093/ije/dyu001
- 639 29. Moreira NF, Sichieri R, Reichenheim ME, De Oliveira ASD, Da Veiga GV. The  
640 associations of BMI trajectory and excessive weight gain with demographic and socio-  
641 economic factors: The Adolescent Nutritional Assessment Longitudinal Study cohort.  
642 *British Journal of Nutrition.* 2015;114: 2032–2038. doi:10.1017/S0007114515003712
- 643 30. Ramos E, Barros H. Family and school determinants of overweight in 13-year-old  
644 Portuguese adolescents. *Acta Paediatrica, International Journal of Paediatrics.* 2007;96:  
645 281–286. doi:10.1111/j.1651-2227.2007.00107.x
- 646 31. Araújo J, Severo M, Barros H, Mishra GD, Guimarães JT, Ramos E. Developmental  
647 trajectories of adiposity from birth until early adulthood and association with  
648 cardiometabolic risk factors. *Int J Obes.* 2015;39: 1443–1449. doi:10.1038/ijo.2015.128
- 649 32. De Moraes MM, Moreira NF, de Oliveira ASD, Cunha DB, Sichieri R, da Veiga GV.  
650 Associations of changes in BMI and body fat percentage with demographic and  
651 socioeconomic factors: the ELANA middle school cohort. *Int J Obes.* 2019;43: 2282–  
652 2290. doi:10.1038/s41366-018-0283-y

- 653 33. Fraga S, Severo M, Ramos E, Kelly-Irving M, Silva S, Ribeiro AI, et al. Childhood  
654 socioeconomic conditions are associated with increased chronic low-grade inflammation  
655 over adolescence: Findings from the EPITeen cohort study. *Arch Dis Child*. 2020;105:  
656 677–683. doi:10.1136/archdischild-2019-317525
- 657 34. Cohort and Longitudinal Studies Enhancement Resources. Harmonised Height, Weight  
658 and BMI in Five Longitudinal Cohort Studies: Millennium Cohort Study. [data  
659 collection] UK Data Service. 2019. doi:http://doi.org/10.5255/UKDA-SN-8550-1
- 660 35. University of London, Institute of Education, Centre for Longitudinal Studies.  
661 Millennium Cohort Study: Sixth Survey, 2015. [data collection]. In: 7th Edition. UK  
662 Data Service. 2020. Available: <http://doi.org/10.5255/UKDA-SN-8156-7>
- 663 36. University of London, Institute of Education, Centre for Longitudinal Studies.  
664 Millennium Cohort Study: Seventh Survey, 2018. [data collection]. In: 2nd Edition. UK  
665 Data Service. 2020. Available: <http://doi.org/10.5255/UKDA-SN-8682-1>
- 666 37. Joshi H, Fitzsimons E. The UK millennium cohort study: The making of a multipurpose  
667 resource for social science and policy. *Longit Life Course Stud*. 2016;7: 409–430.  
668 doi:10.14301/llcs.v7i4.410
- 669 38. Kelly Y. Ethnicity Coding for the Millennium Cohort Study, First Survey, 2001-2003.  
670 [data collection]. UK Data Service. SN: 6073. In: University of London, Institute of  
671 Education, Centre for Longitudinal Studies. 2008.
- 672 39. Jones N, Huttly S. Young Lives: an International Study of Childhood Poverty: Round 1,  
673 2002. [data collection] 6th Edition. UK Data Service. SN: 5307. 2018.  
674 doi:http://doi.org/10.5255/UKDA-SN-5307-3
- 675 40. Boyden J. Young lives: An international study of childhood poverty: Round 2, 2006.  
676 [data collection] 3rd Edition. UK Data Service. SN: 6852. 2018.  
677 doi:http://doi.org/10.5255/UKDA-SN-6852-3

- 678 41. Boyden J. Young lives: An international study of childhood poverty: Round 3, 2009.  
679 [data collection] 3rd Edition. UK Data Service. SN: 6853. 2018.  
680 doi:<http://doi.org/10.5255/UKDA-SN-6853-3>
- 681 42. Woldehanna T, Galab S, Sanchez A, Penny M, Duc L, Boyden J. Young Lives: an  
682 International Study of Childhood Poverty: Round 4, 2013-2014. [data collection]. 2nd  
683 Edition. UK Data Service. SN: 7931. 2018. Available: [http://doi.org/10.5255/UKDA-](http://doi.org/10.5255/UKDA-SN-7931-2)  
684 [SN-7931-2](http://doi.org/10.5255/UKDA-SN-7931-2)
- 685 43. Sanchez A, Penny M, Woldehanna T, Galab S, Boyden J, Duc L. Young Lives: an  
686 International Study of Childhood Poverty: Round 5, 2016. [data collection]. UK Data  
687 Service. SN: 8357. 2018. doi:<http://doi.org/10.5255/UKDA-SN-8357-1>
- 688 44. WHO Expert Committee. Physical Status: The use and interpretation of anthropometry.  
689 WHO Library Cataloguing. Geneva; 1995.
- 690 45. WHO Multicentre Growth Reference Study Group. WHO Child Growth Standards:  
691 Length/height-for-age, weight-for-age, weight-for-length, weight-for-height and body  
692 mass index-for-age - Methods and development. *Acta Paediatr Suppl.* 2006;450: 76–85.  
693 doi:[10.1111/j.1651-2227.2006.tb02378.x](https://doi.org/10.1111/j.1651-2227.2006.tb02378.x)
- 694 46. Laird NM, Ware JH. Random-effects models for longitudinal data. *Biometrics.* 1982;38:  
695 963–974.
- 696 47. Pinheiro J, Bates D, DebRoy S, Sarkar D, Eispack authors, Heisterkamp S, et al.  
697 Package ‘nlme.’ 2022. pp. 1–338. Available: [https://cran.r-](https://cran.r-project.org/web/packages/nlme/nlme.pdf)  
698 [project.org/web/packages/nlme/nlme.pdf](https://cran.r-project.org/web/packages/nlme/nlme.pdf)
- 699 48. Mazzeti CM da S. The allometric or isometric scaling to body mass index in individuals  
700 younger than 20 years. University of São Paulo. 2018. doi:[10.11606/T.6.2018.tde-](https://doi.org/10.11606/T.6.2018.tde-10102018-085303)  
701 [10102018-085303](https://doi.org/10.11606/T.6.2018.tde-10102018-085303)

- 702 49. World Health Organization. Orientation Programme on Adolescent Health for Health-  
703 care Providers. Department of Child and Adolescent Health and Development. Geneva:  
704 World Health Organization; 2018. Available:  
705 [https://www.who.int/maternal\\_child\\_adolescent/documents/pdfs/9241591269\\_op\\_hando](https://www.who.int/maternal_child_adolescent/documents/pdfs/9241591269_op_hando)  
706 [ut.pdf](https://www.who.int/maternal_child_adolescent/documents/pdfs/9241591269_op_hando)
- 707 50. Kato S, Ashizawa K, Satoh K. An examination of the definition “final height” for  
708 practical use. *Ann Hum Biol.* 1998;25: 263–270. doi:10.1080/03014469800005622
- 709 51. De Oliveira MH, Araújo J, Ramos E, Conde WL. MULT: New height references and  
710 their efficiency in multi-ethnic populations. *American Journal of Human Biology.*  
711 2023;35: e23859. doi:10.1002/ajhb.23859
- 712 52. Cole TJ, Green PJ. Smoothing reference centile curves: The LMS method and penalized  
713 likelihood. *Stat Med.* 1992;11: 1305–1319. doi:10.1002/sim.4780111005
- 714 53. Stasinopoulos DM, Rigby RA. Generalized additive models for location scale and shape  
715 (GAMLSS) in R. *J Stat Softw.* 2007;23: 1–46. doi:10.18637/jss.v023.i07
- 716 54. Schwarz G. Estimating the Dimension of a Model. *The Annals of Statistics.* 1978;6:  
717 461–464. doi:10.1214/aos/1176344136
- 718 55. Winkler C, Linden K, Mayr A, Schultz T, Welchowski T, Breuer J, et al. RefCurv: A  
719 software for the construction of pediatric reference curves. *Software Impacts.* 2020;6:  
720 100040. doi:10.1016/j.simpa.2020.100040
- 721 56. Rigby RA, Stasinopoulos DM. Smooth centile curves for skew and kurtotic data  
722 modelled using the Box-Cox power exponential distribution. *Stat Med.* 2004;23: 3053–  
723 3076. doi:10.1002/sim.1861
- 724 57. Van Buuren S, Fredriks M. Worm plot: A simple diagnostic device for modelling growth  
725 reference curves. *Stat Med.* 2001;20: 1259–1277. doi:10.1002/sim.746

- 726 58. R Core Team. R: A language and environment for statistical computing. R Foundation  
727 for Statistical Computing, editor. Vienna, Austria; 2022.
- 728 59. Rolland-Cachera MF, Sempé M, Guilloud-Bataille M, Patois E, Péquignot-Guggenbuhl  
729 F, Fautrad V. Adiposity indices in children. *Am J Clin Nutr.* 1982;36: 178–184.  
730 doi:10.1093/ajcn/36.1.178
- 731 60. Bentham J, Di Cesare M, Bilano V, Bixby H, Zhou B, Stevens GA, et al. Worldwide  
732 trends in body-mass index, underweight, overweight, and obesity from 1975 to 2016: a  
733 pooled analysis of 2416 population-based measurement studies in 128.9 million children,  
734 adolescents, and adults. *The Lancet.* 2017;390: 2627–2642. doi:10.1016/S0140-  
735 6736(17)32129-3
- 736 61. Keys A, Fidanza F, Karvonen MJ, Kimura N, Taylor HL. Indices of relative weight and  
737 obesity. *Int J Epidemiol.* 2014;43: 655–665. doi:10.1093/ije/dyu058
- 738 62. Peterson CM, Su H, Thomas DM, Heo M, Golnabi AH, Pietrobelli A, et al. Tri-Ponderal  
739 Mass Index vs Body Mass Index in Estimating Body Fat During Adolescence. *JAMA*  
740 *Pediatr.* 2017;171: 629–636. doi:10.1001/jamapediatrics.2017.0460
- 741 63. Lebiedowska MK, Alter KE, Stanhope SJ. Human body shape index based on an  
742 experimentally derived model of human growth. *J Pediatr.* 2008;152: 45-49e1-2.  
743 doi:10.1016/j.jpeds.2007.05.046
- 744 64. Mei Z, Grummer-Strawn LM, Pietrobelli A, Goulding A, Goran MI, Dietz WH. Validity  
745 of body mass index compared with other body-composition screening indexes for the  
746 assessment of body fatness in children and adolescents. *Am J Clin Nutr.* 2002;75: 978–  
747 985. doi:10.1093/ajcn/75.6.978
- 748 65. Metcalf BS, Hosking J, Frémeaux AE, Jeffery AN, Voss LD, Wilkin TJ. BMI was right  
749 all along: taller children really are fatter (implications of making childhood BMI



- 750 independent of height) *EarlyBird* 48. *Int J Obes.* 2011;35: 541–547.  
751 doi:10.1038/ijo.2010.258
- 752 66. Nevill AM, Stewart AD, Olds T, Holder R. Relationship between adiposity and body  
753 size reveals limitations of BMI. *Am J Phys Anthropol.* 2006;129: 151–156.  
754 doi:10.1002/ajpa.20262
- 755 67. Wells JC, Treleaven P, Cole TJ. BMI compared with 3-dimensional body shape: the UK  
756 National Sizing Survey. *Am J Clin Nutr.* 2007;85: 419–425. doi:10.1093/ajcn/85.2.419
- 757 68. Eveleth PB, Tanner JM. *Worldwide Variation in Human Growth.* Cambridge University  
758 Press; 1991. doi:10.1017/CBO9780511629105
- 759 69. Gould SJ. Allometry and size in ontogeny and phylogeny. *Biological Reviews.* 1966;41:  
760 587–638. doi:10.1111/j.1469-185X.1966.tb01624.x
- 761 70. Shingleton AW. Allometry: the study of biological scaling. *Nature Education*  
762 *Knowledge.* 2010;3: 2.
- 763 71. Urlacher SS, Blackwell AD, Liebert MA, Madimenos FC, Cepon-Robins TJ, Gildner  
764 TE, et al. Physical growth of the shuar: Height, Weight, and BMI references for an  
765 indigenous amazonian population. *American Journal of Human Biology.* 2016;28: 16–  
766 30. doi:10.1002/ajhb.22747
- 767 72. Hruschka DJ, Hackman J V., Stulp G. Identifying the limits to socioeconomic influences  
768 on human growth. *Econ Hum Biol.* 2019;34: 239–251. doi:10.1016/j.ehb.2018.12.005
- 769 73. Wells JC. Worldwide variability in growth and its association with health: Incorporating  
770 body composition, developmental plasticity, and intergenerational effects. *American*  
771 *Journal of Human Biology.* 2017;29: e22954. doi:10.1002/ajhb.22954
- 772 74. Henn BM, Gignoux CR, Jobin M, Granka JM, Macpherson JM, Kidd JM, et al. Hunter-  
773 gatherer genomic diversity suggests a southern African origin for modern humans.

- 774 Proceedings of the National Academy of Sciences. 2011;108: 5154–5162.  
775 doi:10.1073/pnas.1017511108
- 776 75. Karafet TM, Osipova LP, Gubina MA, Posukh OL, Zegura SL, Hammer MF. High  
777 levels of Y-chromosome differentiation among Native Siberian populations and the  
778 genetic signature of a boreal hunter-gatherer way of life. *Hum Biol.* 2002;74: 761–789.  
779 doi:10.1353/hub.2003.0006
- 780 76. Wang S, Lewis CM, Jakobsson M, Ramachandran S, Ray N, Bedoya G, et al. Genetic  
781 variation and population structure in Native Americans. *PLoS Genet.* 2007;3: e185.  
782 doi:10.1371/journal.pgen.0030185
- 783 77. Foster Z, Byron E, Reyes García V, Huanca T, Vadez V, Apaza L, et al. Physical  
784 growth and nutritional status of Tsimane’ Amerindian children of lowland Bolivia. *Am J*  
785 *Phys Anthropol.* 2005;126: 343–351. doi:10.1002/ajpa.20098
- 786 78. Hodge LG, Dufour DL. Cross-sectional growth of young Shipibo Indian children in  
787 Eastern Peru. *Am J Phys Anthropol.* 1991;84: 35–41. doi:10.1002/ajpa.1330840104
- 788 79. Santos R V, Coimbra Júnior CE. Socioeconomic transition and physical growth of Tupí-  
789 Mondê Amerindian children of the Aripuanã Park, Brazilian Amazon. *Hum Biol.*  
790 1991;63: 795–819.
- 791 80. Cole TJ, Bellizzi MC, Flegal KM, Dietz WH. Establishing a standard definition for child  
792 overweight and obesity worldwide: international survey. *BMJ.* 2000;320: 1240–1243.  
793 doi:10.1136/bmj.320.7244.1240
- 794 81. Gleiss A, Lassi M, Blümel P, Borkenstein M, Kapelari K, Mayer M, et al. Austrian  
795 height and body proportion references for children aged 4 to under 19 years. *Ann Hum*  
796 *Biol.* 2013;40: 324–332. doi:10.3109/03014460.2013.776110
- 797 82. Guedes DP, De Matos JAB, Lopes VP, Ferreirinha JE, Silva AJ. Physical growth of  
798 schoolchildren from the Jequitinhonha Valley, Minas Gerais, Brazil: Comparison with

- 799 the CDC-2000 reference using the LMS method. *Ann Hum Biol.* 2010;37: 574–584.  
800 doi:10.3109/03014460903524469
- 801 83. Hakeem R, Shaikh AH, Asar F. Assessment of linear growth of affluent urban Pakistani  
802 adolescents according to CDC 2000 references. *Ann Hum Biol.* 2004;31: 282–291.  
803 doi:10.1080/03014460310001658800
- 804 84. Hasan M, Batieha A, Jadou H, Khawaldeh A, Ajlouni K. Growth status of Jordanian  
805 schoolchildren in military-funded schools. *Eur J Clin Nutr.* 2001;55: 380–386.  
806 doi:10.1038/sj.ejcn.1601167
- 807 85. Marwaha RK, Tandon N, Singh Y, Aggarwal R, Grewal K, Mani K. A study of growth  
808 parameters and prevalence of overweight and obesity in school children from delhi.  
809 *Indian Pediatr.* 2006;43: 943–52.
- 810 86. Mushtaq MU, Gull S, Mushtaq K, Abdullah HM, Khurshid U, Shahid U, et al. Height,  
811 weight and BMI percentiles and nutritional status relative to the international growth  
812 references among Pakistani school-aged children. *BMC Pediatr.* 2012;12: 1–11.  
813 doi:10.1186/1471-2431-12-31
- 814 87. Neyzi O, Furman A, Bundak R, Gunoz H, Darendeliler F, Bas F. Growth references for  
815 Turkish children aged 6 to 18 years. *Acta Paediatr.* 2006;95: 1635–1641.  
816 doi:10.1080/08035250600652013
- 817 88. Ulijaszek S. Ethnic differences in patterns of human growth in stature. In: Martorell R,  
818 Haschke F, editors. *Nutrition and Growth*. Philadelphia: Lippincott-Williams and  
819 Wilkins; 2001. pp. 1–20.
- 820 89. Ulijaszek SJ. Between-population variation in pre-adolescent growth. *Eur J Clin Nutr.*  
821 1994;48: S5–S13.
- 822 90. Cole TJ. The development of growth references and growth charts. *Ann Hum Biol.*  
823 2012;39: 382–394. doi:10.3109/03014460.2012.694475

- 824 91. Ohuma EO, Altman DG. Design and other methodological considerations for the  
825 construction of human fetal and neonatal size and growth charts. *Stat Med*. 2019;38:  
826 3527–3539. doi:10.1002/sim.8000
- 827 92. Adom T, Kengne AP, Villiers A De, Boatin R, Puoane T. Diagnostic accuracy of body  
828 mass index in defining childhood obesity: Analysis of cross-sectional data from  
829 Ghanaian children. *Int J Environ Res Public Health*. 2020;17: 36.  
830 doi:10.3390/ijerph17010036
- 831 93. Chinn S, Rona RJ. International definitions of overweight and obesity for children: A  
832 lasting solution? *Ann Hum Biol*. 2002;29: 306–313. doi:10.1080/03014460110085340
- 833 94. Ferreira AA. Evaluation of the growth of children: path of the growth charts.  
834 *DEMETERA: Alimentação, Nutrição & Saúde*. 2012;7: 191–202.  
835 doi:10.12957/demetra.2012.3786
- 836 95. Iftikhar S, Khan N, Siddiqui JS, Baig-Ansari N. Development of Growth Charts of  
837 Pakistani Children Aged 4-15 Years Using Quantile Regression: A Cross-sectional  
838 Study. *Cureus*. 2018;10: e2138. doi:10.7759/cureus.2138
- 839 96. Khadilkar V V, Khadilkar A V. Revised Indian Academy of Pediatrics 2015 growth  
840 charts for height, weight and body mass index for 5-18-year-old Indian children. *Indian J*  
841 *Endocrinol Metab*. 2015;19: 470–476. doi:10.4103/2230-8210.159028
- 842 97. WorldoMeter. Portugal Demographics. 2019 [cited 9 May 2022]. Available:  
843 <https://www.worldometers.info/demographics/portugal-demographics/>
- 844 98. Fundação Ceperj. Anuário Estatístico do Estado do Rio de Janeiro. Rio de Janeiro; 2013.  
845 Available:  
846 [http://arquivos.proderj.rj.gov.br/sefaz\\_ceperj\\_imagens/Arquivos\\_ceperj/ceep/dados-](http://arquivos.proderj.rj.gov.br/sefaz_ceperj_imagens/Arquivos_ceperj/ceep/dados-estatisticos/anuario-online/Anuario2013/ApresentacaoDemografiaMigracao.html)  
847 [estatisticos/anuario-online/Anuario2013/ApresentacaoDemografiaMigracao.html](http://arquivos.proderj.rj.gov.br/sefaz_ceperj_imagens/Arquivos_ceperj/ceep/dados-estatisticos/anuario-online/Anuario2013/ApresentacaoDemografiaMigracao.html)

848 99. Vasconcellos F, Bertolucci R. Um novo lar: população do Rio tem 15,3% de  
849 migrantes. O Globo Rio. 4 May 2017. Available:  
850 <https://oglobo.globo.com/rio/um-novo-lar-populacao-do-rio-tem-153-de->  
851 [migrantes-12375363](https://oglobo.globo.com/rio/um-novo-lar-populacao-do-rio-tem-153-de-migrantes-12375363)

## 852 **Supporting information**

853

854 **S1 Fig. Worm plot of the ABMI reference for boys.**

855

856 **S2 Fig. Worm plot of the ABMI reference for girls.**

857

858

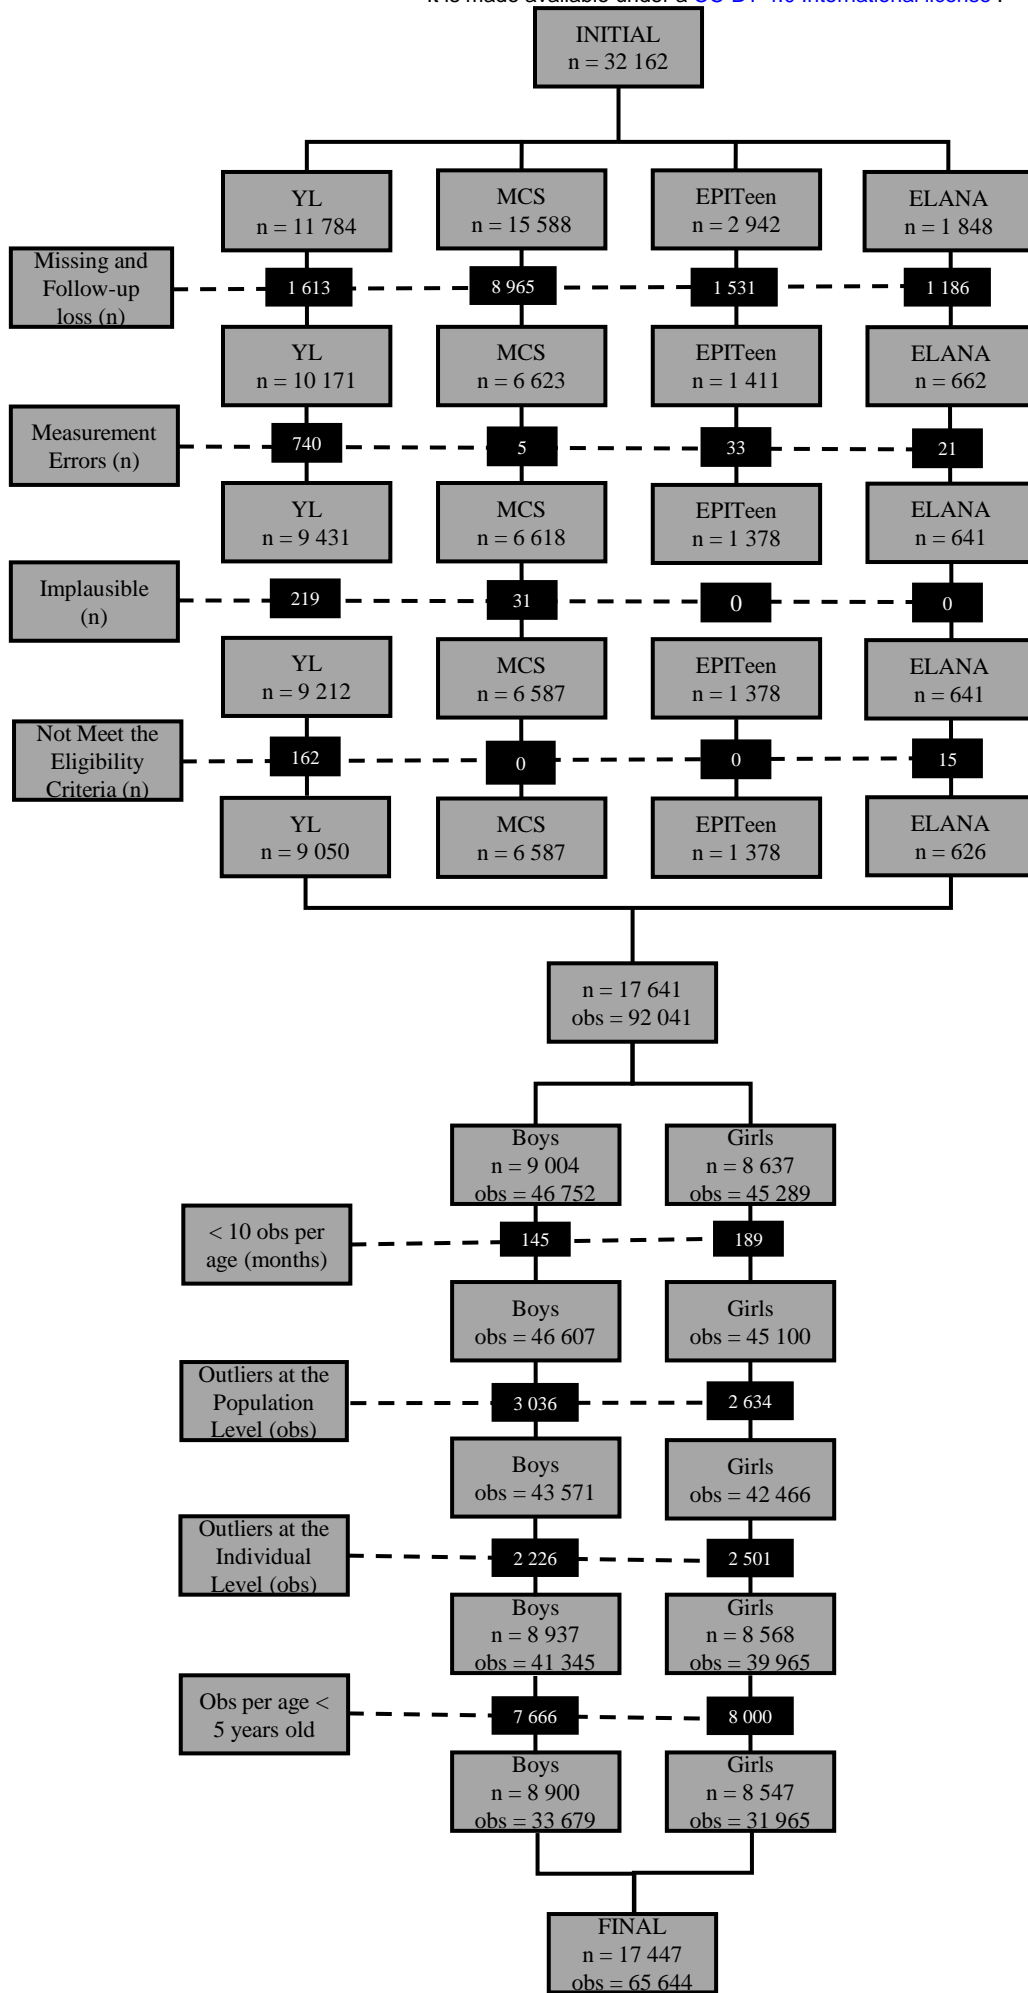

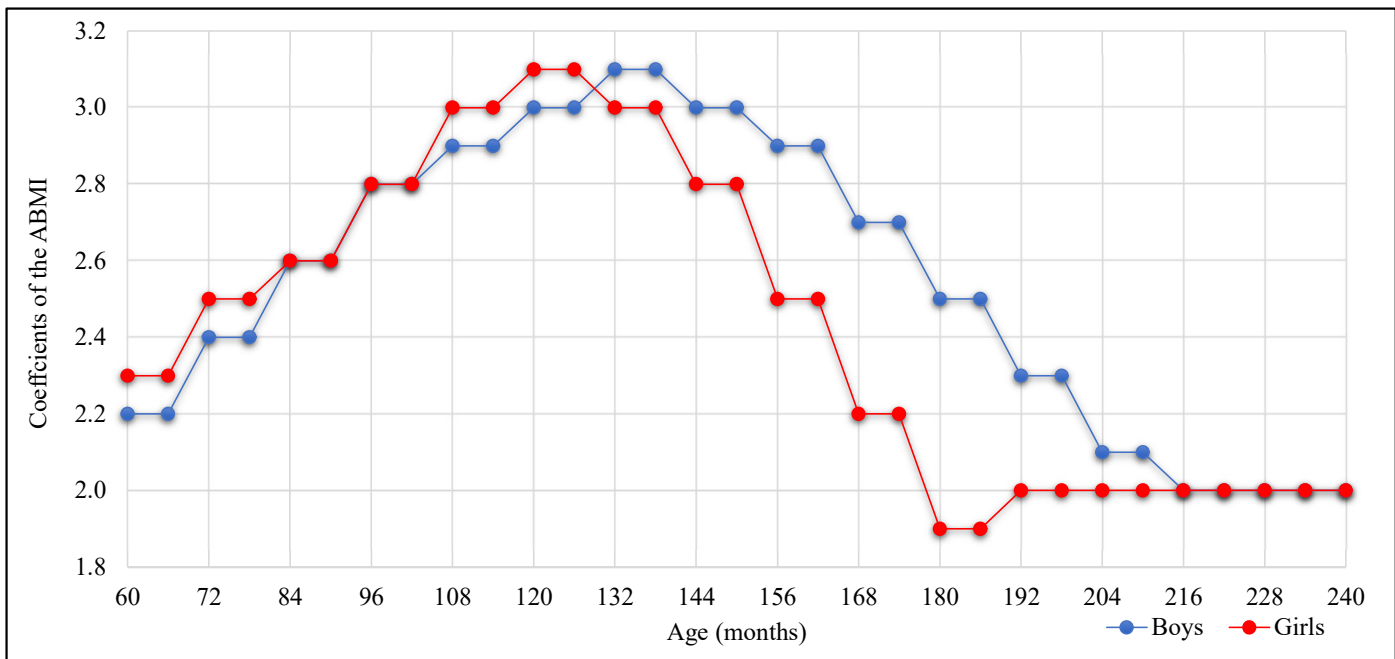

Differences in body mass z-scores

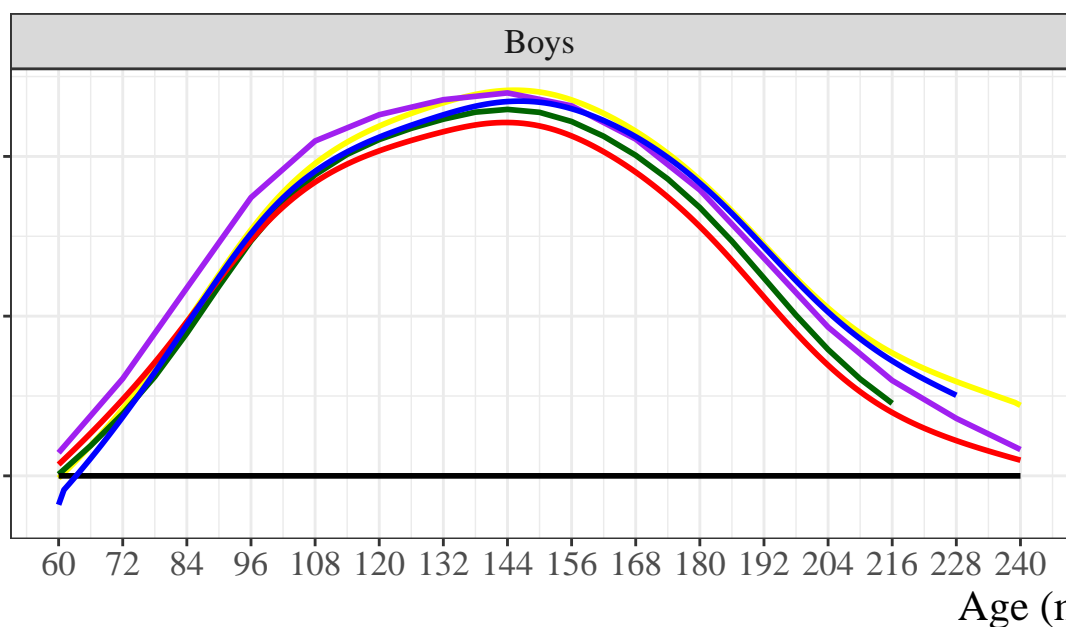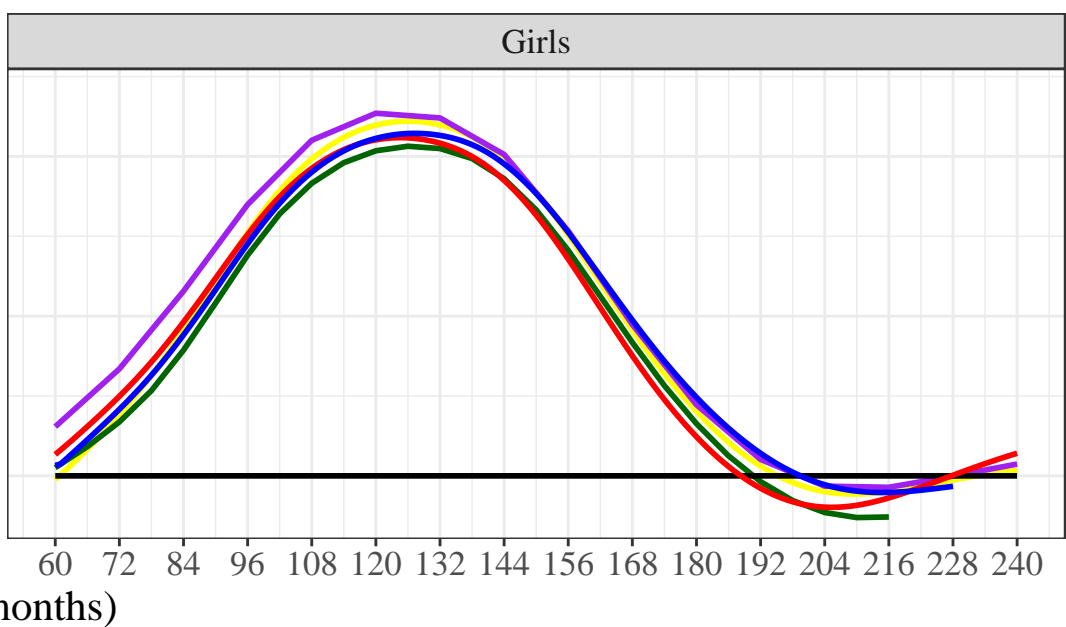

— CDC — IOTF — MULT BMI  
— DUTCH — MULT ABMI — WHO

Mass Index  $\text{kg}/\text{m}^x$

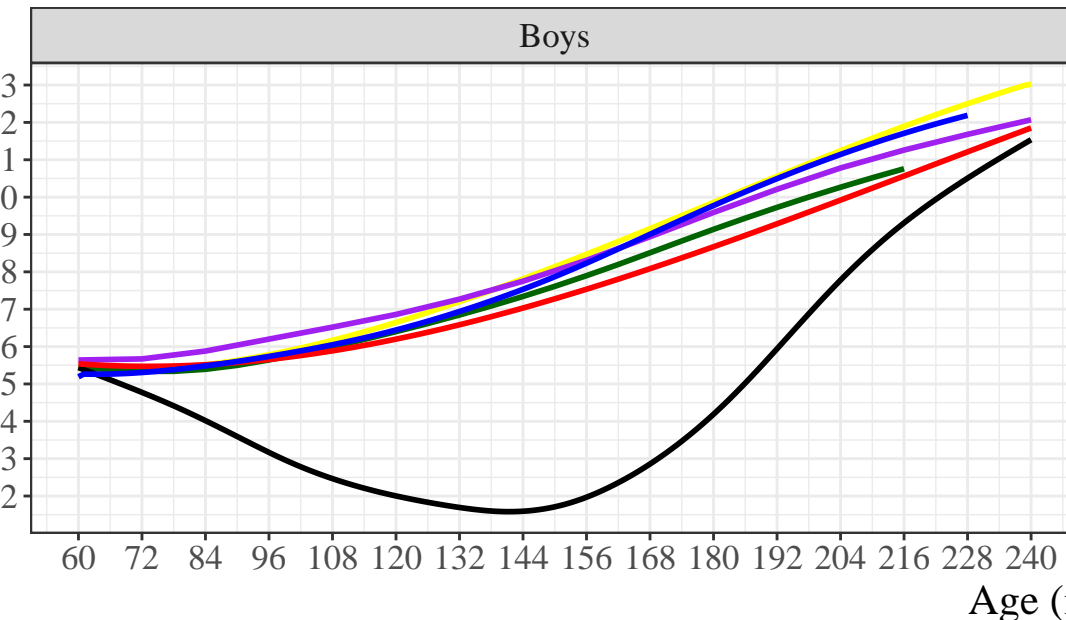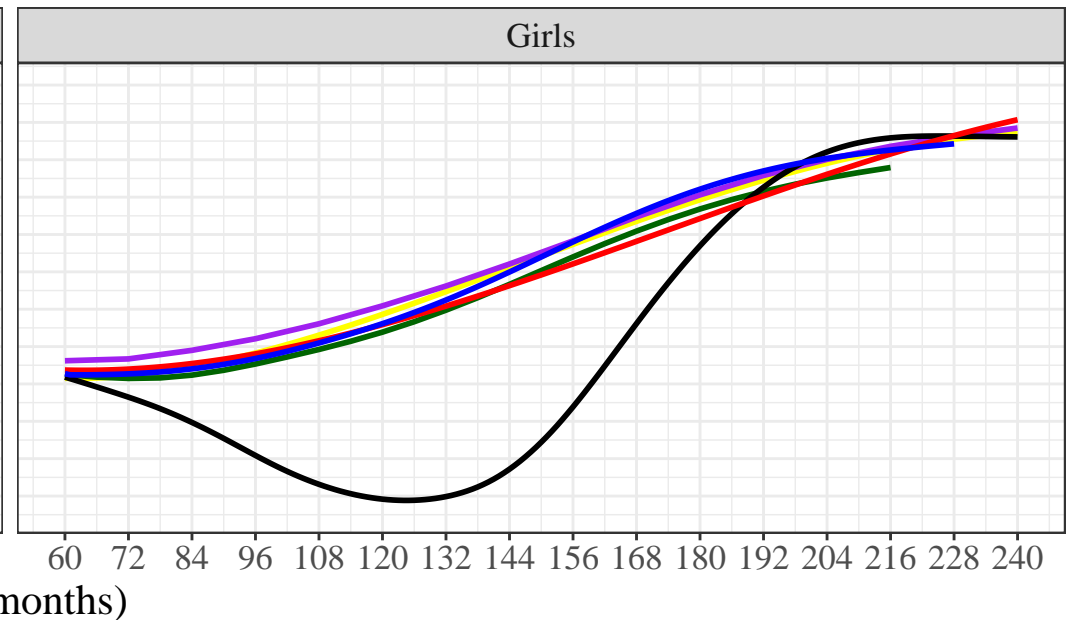

— CDC — IOTF — MULT BMI  
— DUTCH — MULT ABMI — WHO



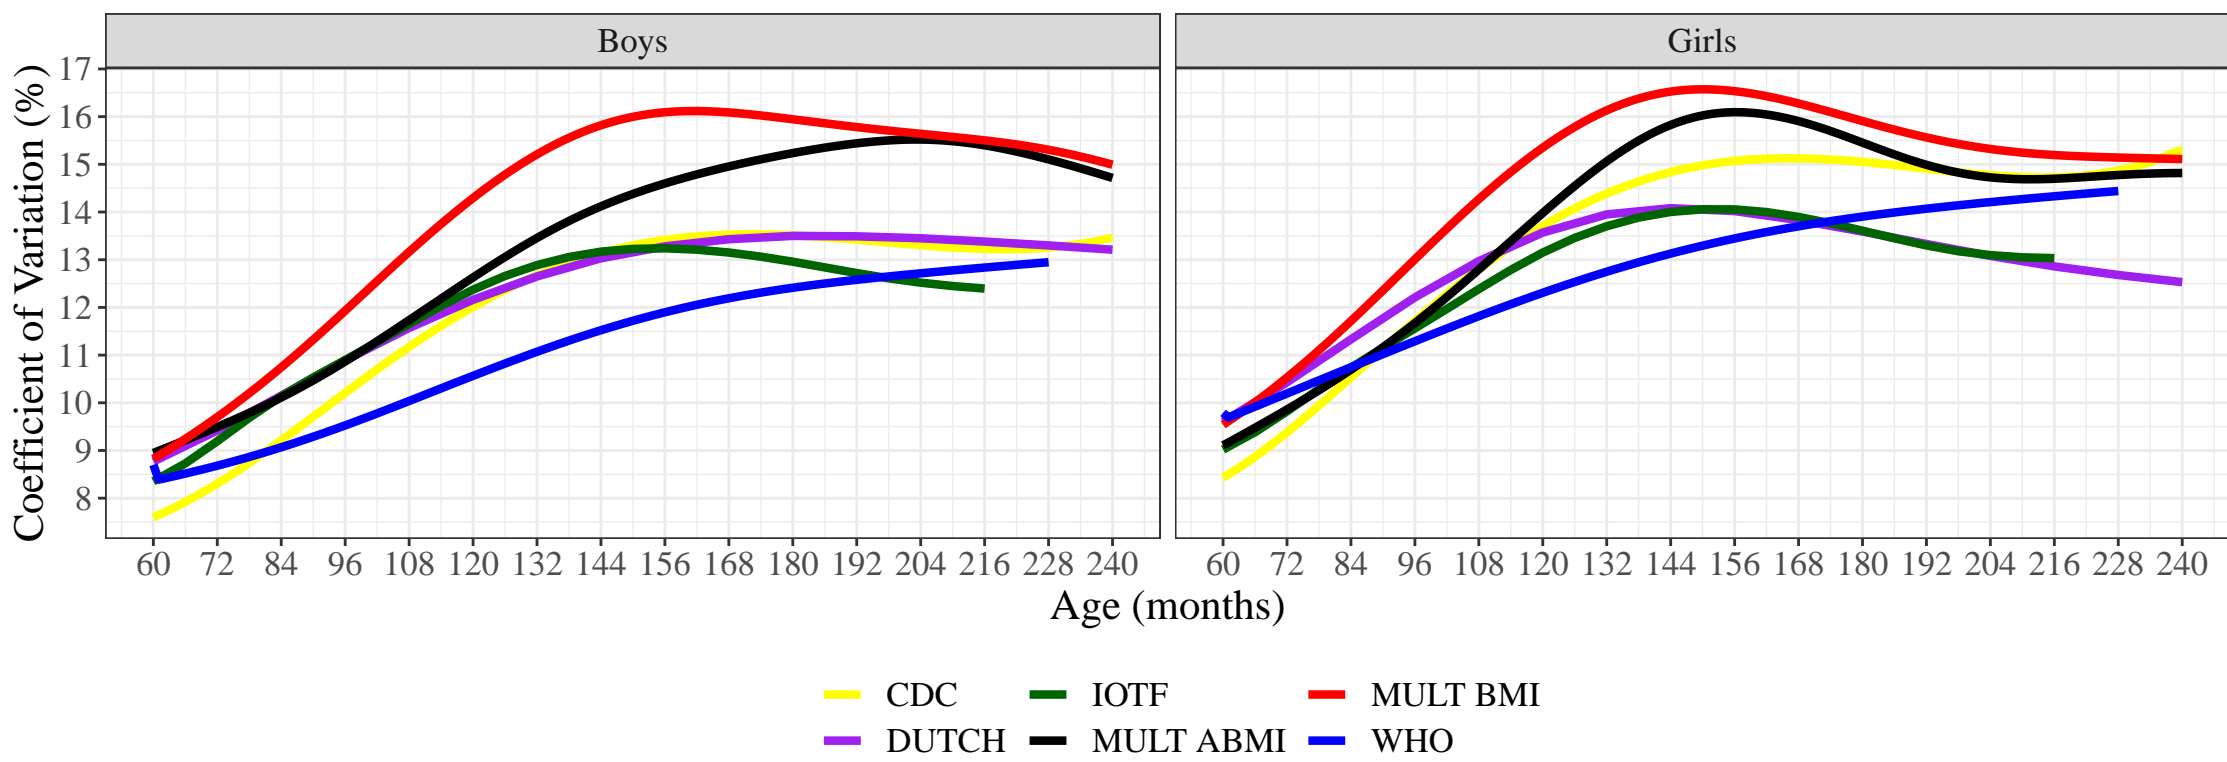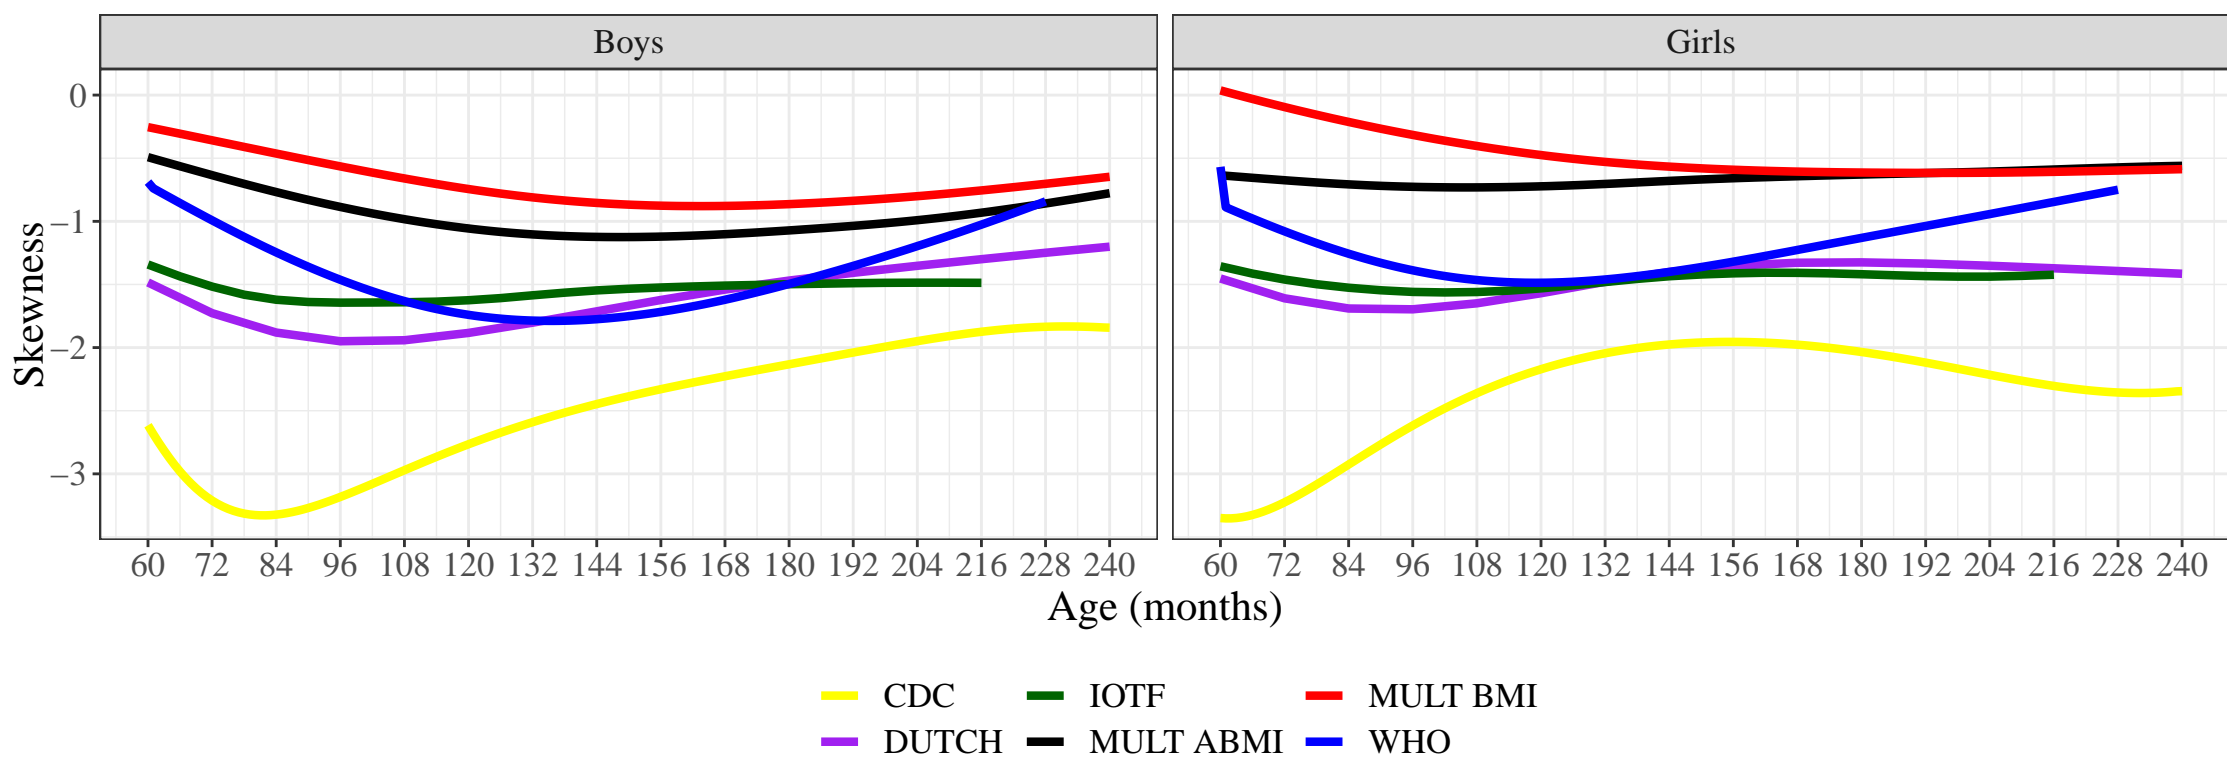

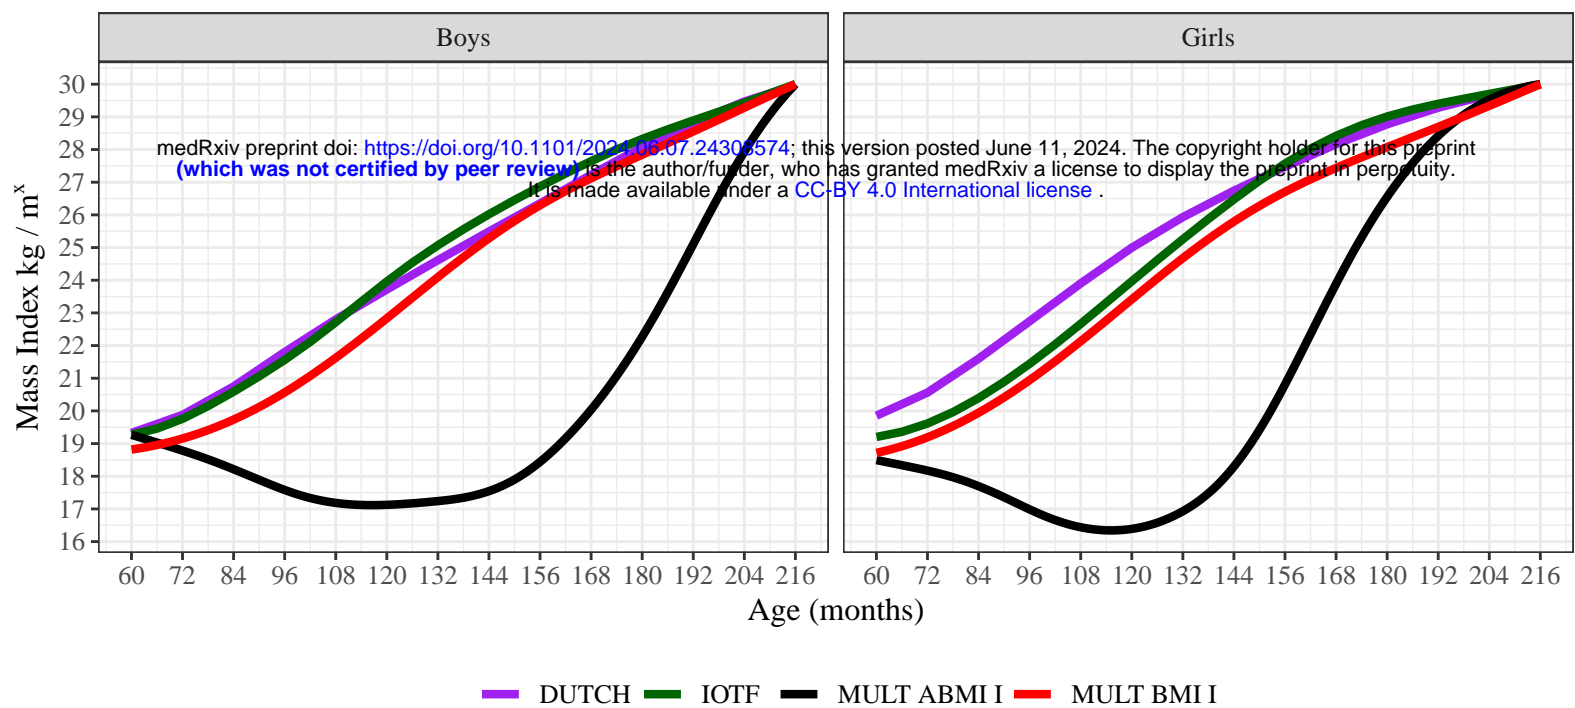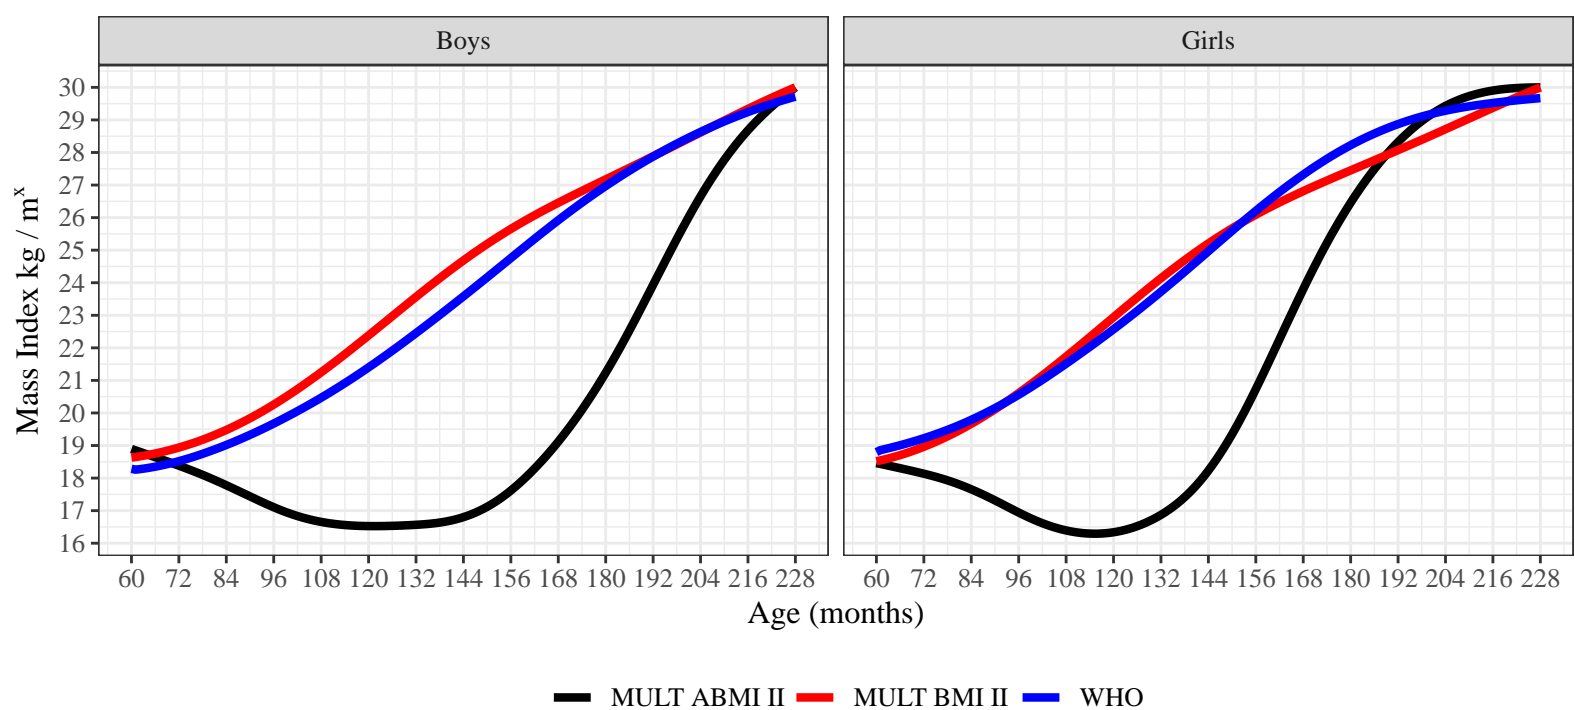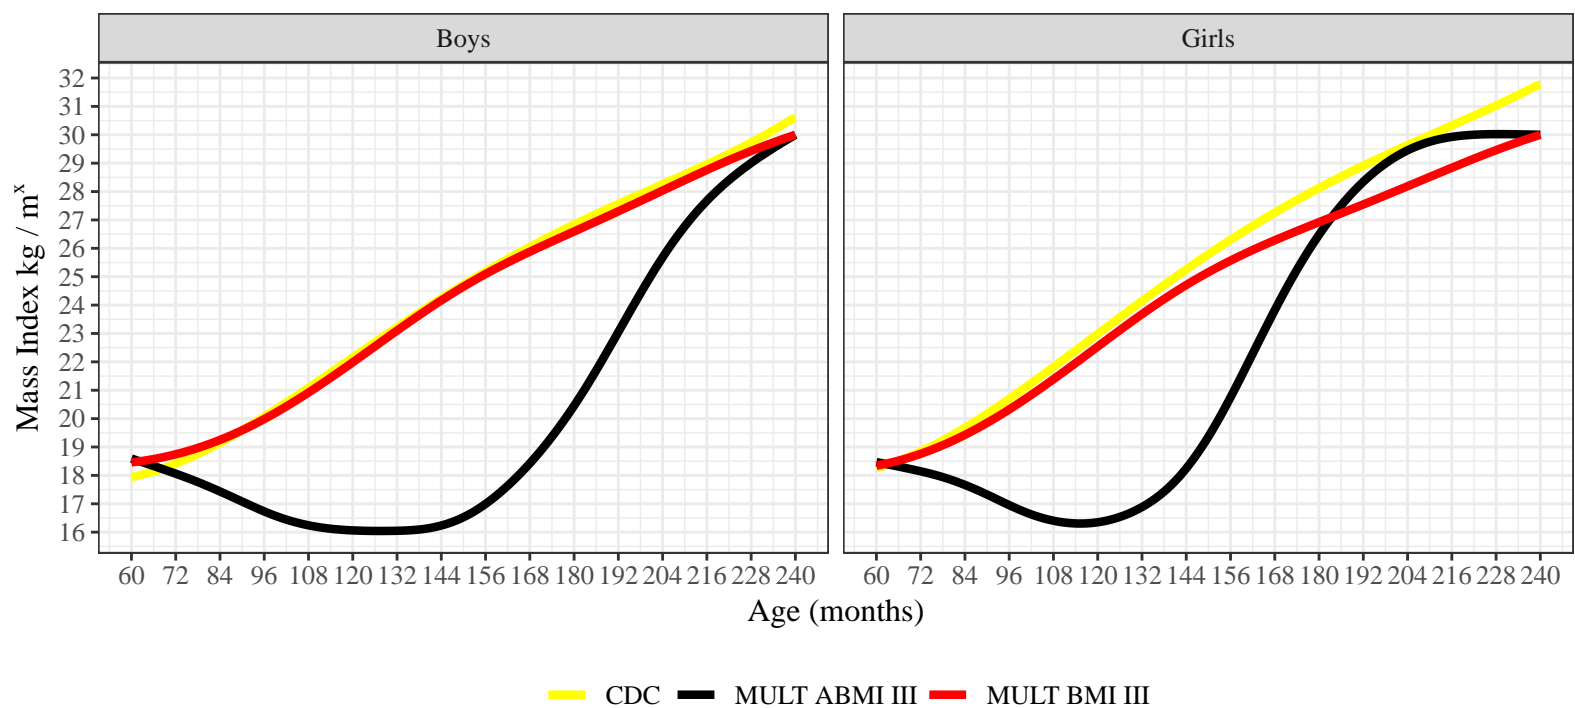

# ABMI-for-age (BOYS)

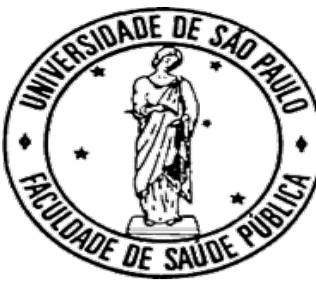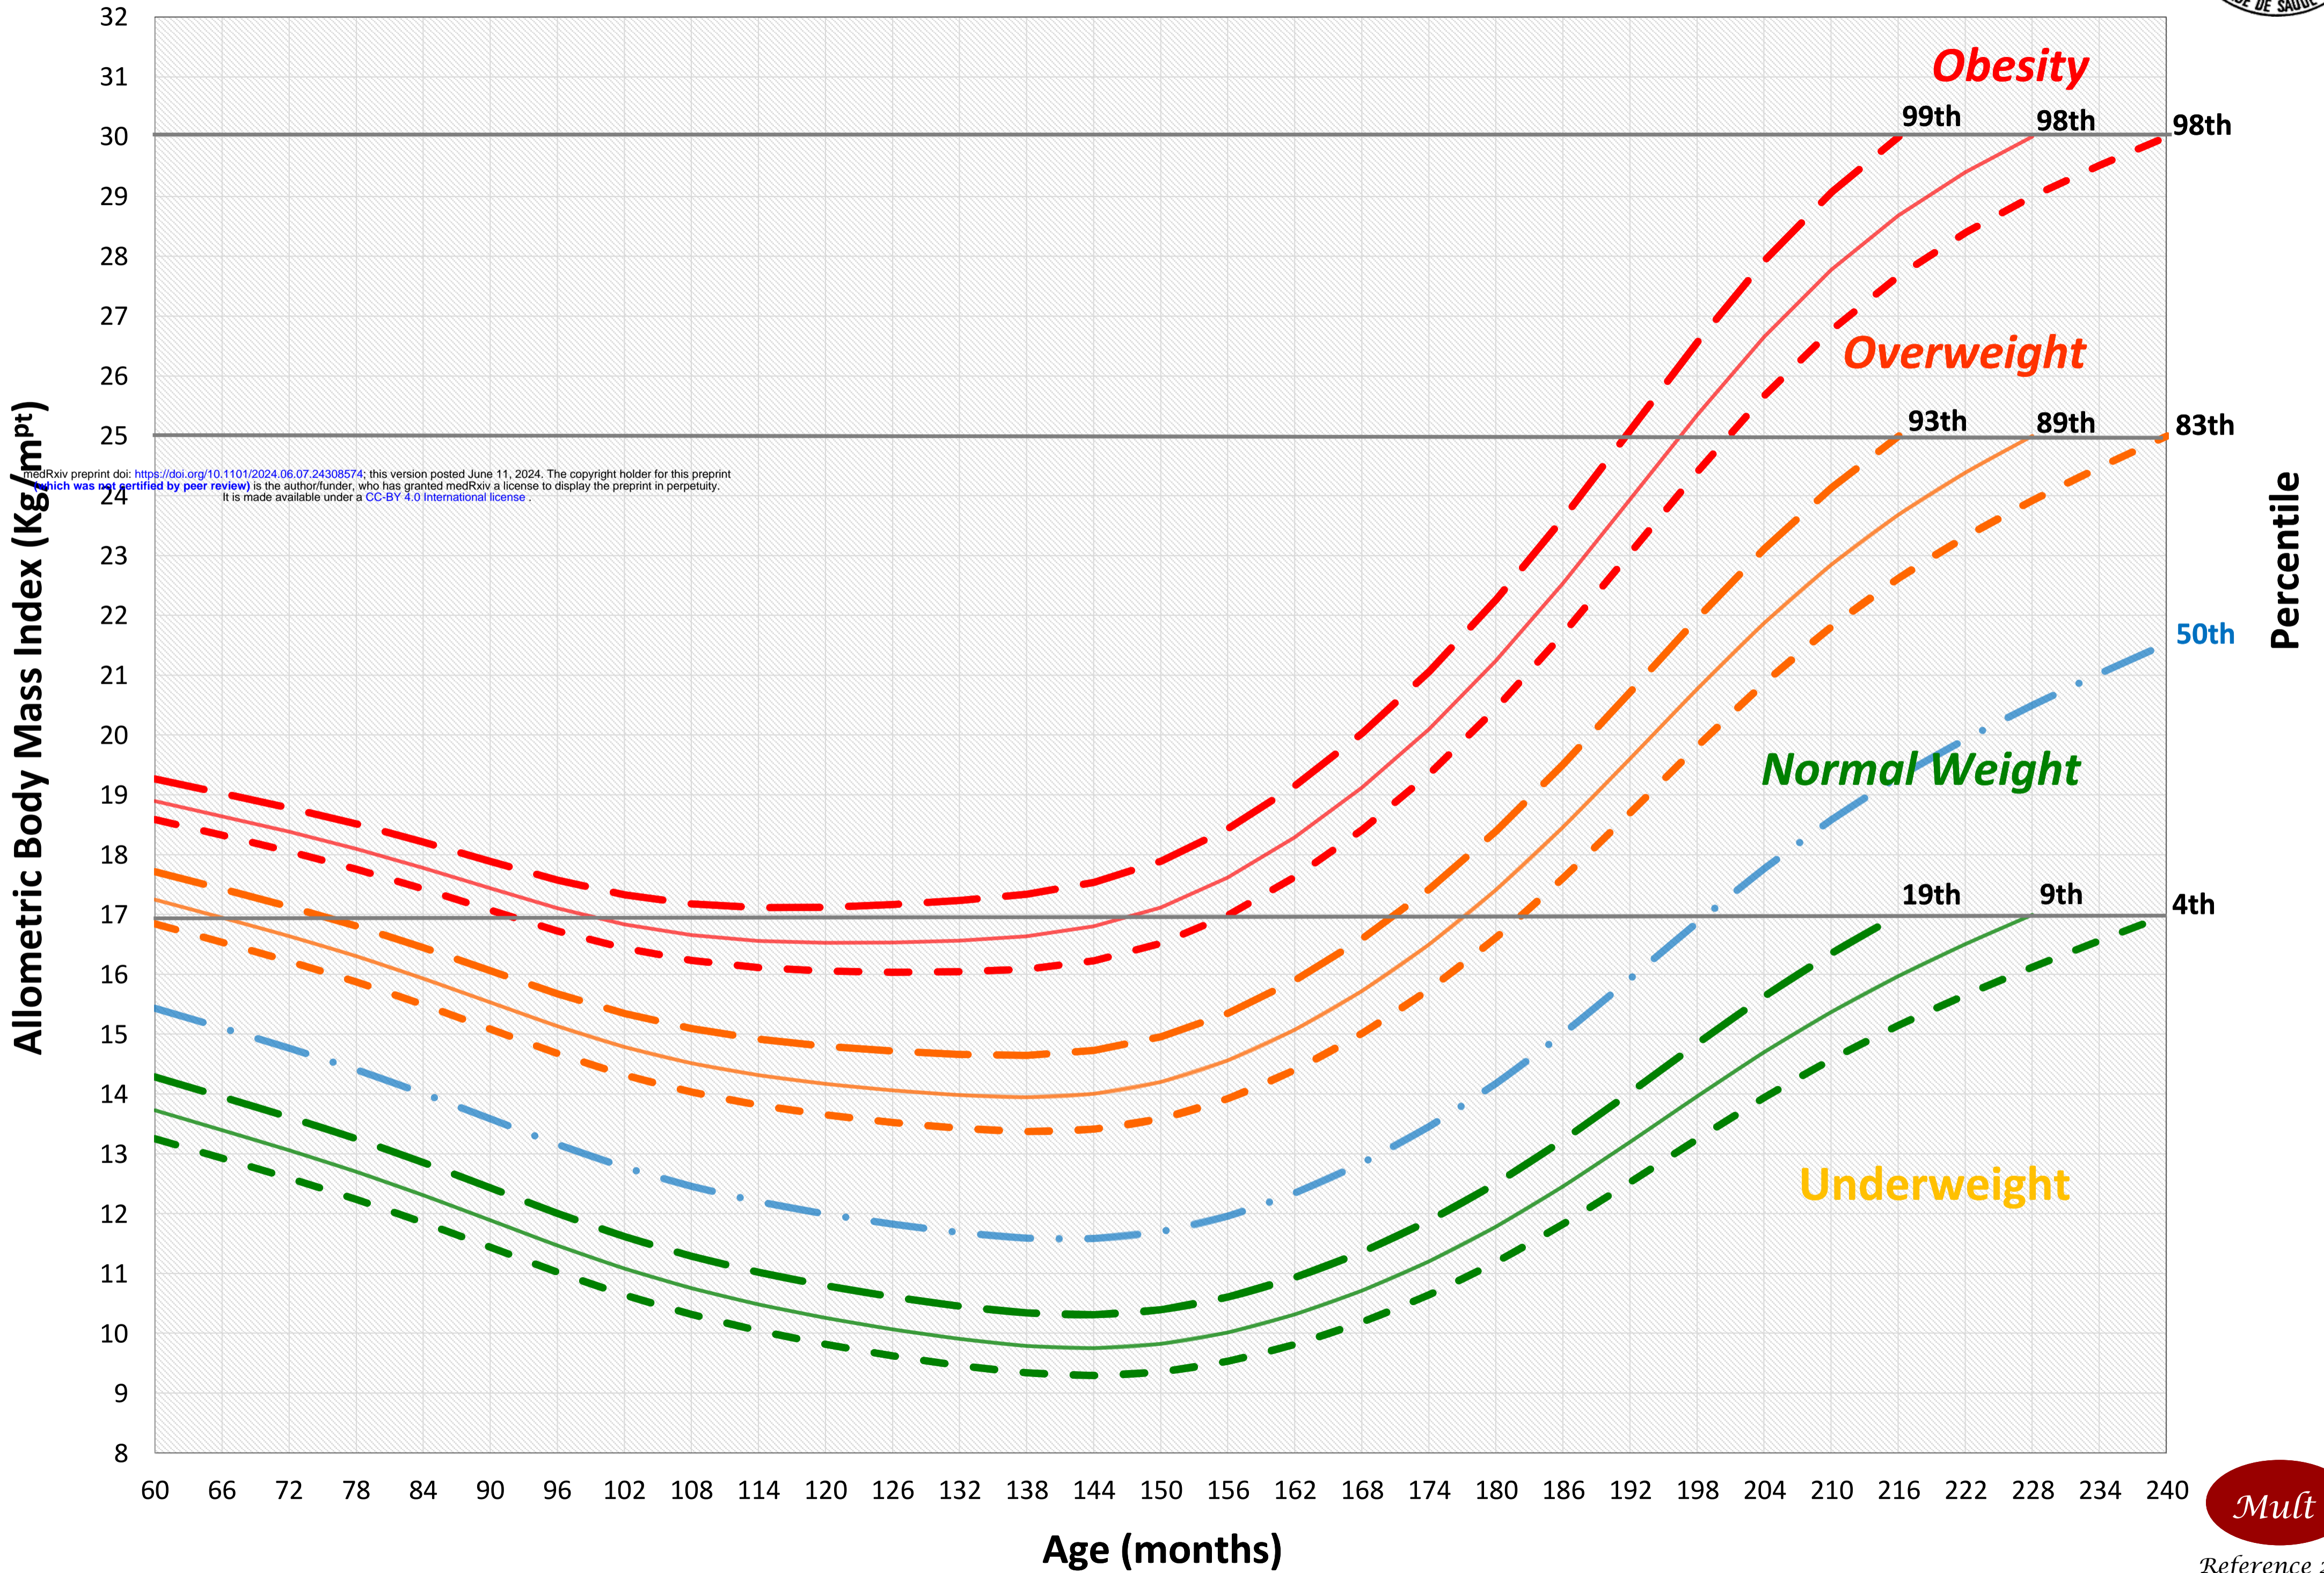

medRxiv preprint doi: <https://doi.org/10.1101/2024.06.07.24308574>; this version posted June 11, 2024. The copyright holder for this preprint (which was not certified by peer review) is the author/funder, who has granted medRxiv a license to display the preprint in perpetuity. It is made available under a [CC-BY 4.0 International license](https://creativecommons.org/licenses/by/4.0/).

# ABMI-for-age (GIRLS)

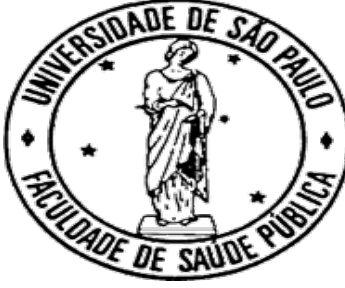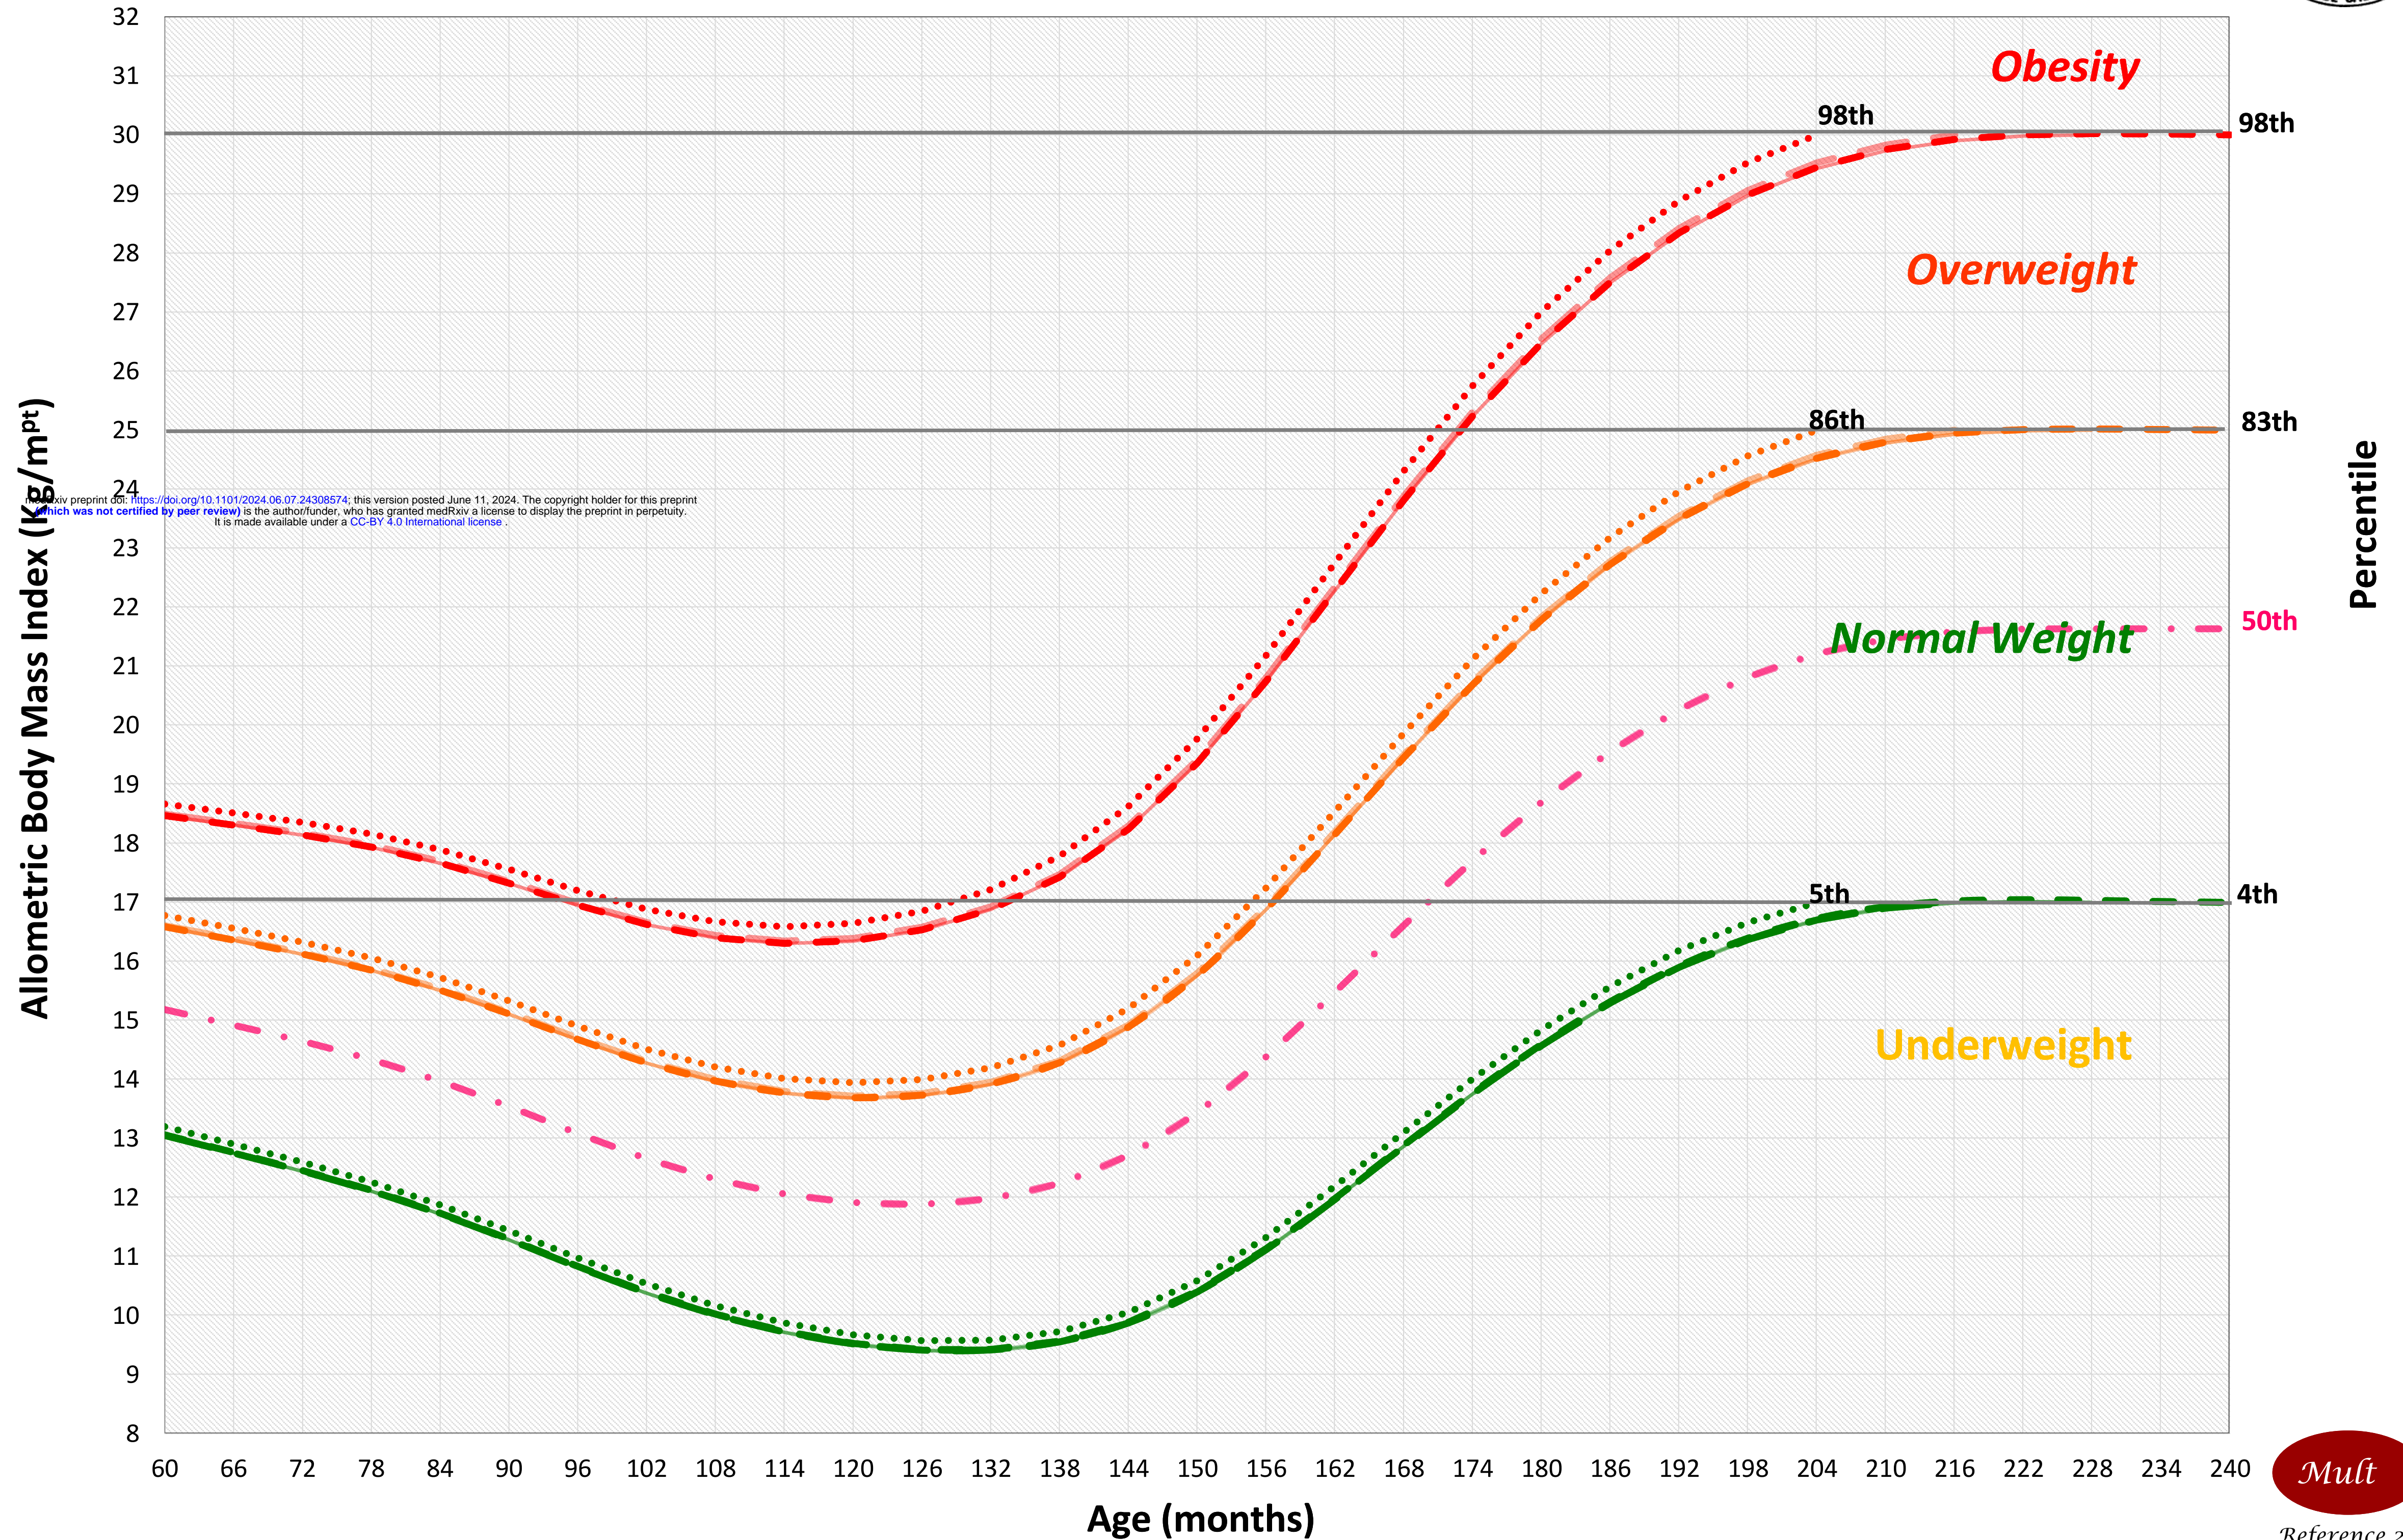

bioRxiv preprint doi: <https://doi.org/10.1101/2024.06.07.24308574>; this version posted June 11, 2024. The copyright holder for this preprint (which was not certified by peer review) is the author/funder, who has granted medRxiv a license to display the preprint in perpetuity. It is made available under a [CC-BY 4.0 International license](https://creativecommons.org/licenses/by/4.0/).
